# Supplementary material for: Impact of occupational pesticide exposure assessment method on risk estimates for prostate cancer, non-Hodgkin’s lymphoma and Parkinson’s disease: results of three meta-analyses
Source: HighWire-hosted journal article supplement (doi:10.1136/oemed-2021-108046), 2022-04-07
Supplement: oemed-2021-108046supp001_data_supplement.pdf [file oemed-2021-108046supp001_data_supplement.pdf]

| Article                    | Article name                                                                                                                                                                     | Publication year | Health outcome         | Exposure assessment method     | Exposure assessment method type | Study design              | Study population                            | Sample size | Number of cases | Number of controls | Number of exposed cases | Exposure definition and comparison                                                                                                                                                  | Risk measure | Risk estimate | Lower CI | Upper CI | Type of pesticide     | Study location |
|----------------------------|----------------------------------------------------------------------------------------------------------------------------------------------------------------------------------|------------------|------------------------|--------------------------------|---------------------------------|---------------------------|---------------------------------------------|-------------|-----------------|--------------------|-------------------------|-------------------------------------------------------------------------------------------------------------------------------------------------------------------------------------|--------------|---------------|----------|----------|-----------------------|----------------|
| Demers 2006. Exp. AI       | Cancer and occupational exposure to pentachlorophenol and tetrachlorophenol (Canada)                                                                                             | 2006             | Non-Hodgkin's lymphoma | Expert case-by-case assessment | Expert-level assessment         | Retrospective cohort      | Sawmill workers                             | 27464       | 92              |                    | 17                      | 5+ exposure years of cumulative dermal pentachlorophenol exposure.                                                                                                                  | RR           | 1.71          | 0.91     | 3.24     | Pentachlorophenol     | Canada         |
| Demers 2006. JT. GenP      | Cancer and occupational exposure to pentachlorophenol and tetrachlorophenol (Canada)                                                                                             | 2006             | Non-Hodgkin's lymphoma | Job title                      | Group-based assessment          | Retrospective cohort      | Sawmill workers                             | 27464       | 92              |                    | 92                      | Standardized incidence rates calculated based on comparison with British Columbia provincial rates. Workers exposure classified based on their work area listed in personnel files. | SIR          | 0.99          | 0.81     | 1.21     | Pesticides in general | Canada         |
| Lyngø 1998. Class          | Cancer incidence in Danish phenoxy herbicide workers, 1947-1993                                                                                                                  | 1998             | Non-Hodgkin's lymphoma | Registers                      | Group-based assessment          | Retrospective cohort      | Pesticide manufacturers                     | 2119        | 6               |                    | 6                       | Pesticide applicators from AHS                                                                                                                                                      | SIR          | 1.10          | 0.4      | 2.6      | Phenoxy herbicides    | Denmark        |
| Alavanja 2014. AI          | Non-hodgkin lymphoma risk and insecticide, fungicide and fumigant use in the agricultural health study                                                                           | 2014             | Non-Hodgkin's lymphoma | Algorithm/model                | Expert-level assessment         | Prospective cohort        |                                             | 54306       | 523             |                    | 14                      | Intensity-weighted lifetime days.                                                                                                                                                   | RR           | 1.8           | 1.0      | 3.2      | Lindane               | USA            |
| Kachuri 2017. M. GenP      | Cancer risks in a population-based study of 70,570 agricultural workers: results from the Canadian census health and Environment cohort (CanCHEC)                                | 2017             | Non-Hodgkin's lymphoma | Job title                      | Group-based assessment          | Prospective cohort        | Agricultural workers                        | 70570       | 500             |                    | 500                     | Agricultural worker versus not agricultural worker in all other members of the cohort.                                                                                              | HR           | 1.10          | 1.00     | 1.21     | Pesticides in general | Canada         |
| Kachuri 2017.W. GenP       | Cancer risks in a population-based study of 70,570 agricultural workers: results from the Canadian census health and Environment cohort (CanCHEC)                                | 2017             | Non-Hodgkin's lymphoma | Job title                      | Group-based assessment          | Prospective cohort        | Agricultural workers                        | 70570       | 135             |                    | 135                     | Agricultural worker versus not agricultural worker in all other members of the cohort.                                                                                              | HR           | 1.02          | 0.86     | 1.22     | Pesticides in general | Canada         |
| Lemarchand 2017. M. GenP   | Cancer incidence in the AGRICAN cohort study (2005-2011)                                                                                                                         | 2017             | Non-Hodgkin's lymphoma | Self-reported exposure         | Self-reported exposure          | Prospective cohort        | Farmers (as insured by MSA in France)       | 98794       | 644             |                    | 310                     | Pesticide use on crops (yes versus no)                                                                                                                                              | SIR          | 1.01          | 0.90     | 1.12     | Pesticides in general | USA            |
| Lemarchand 2017. W. GenP   | Cancer incidence in the AGRICAN cohort study (2005-2011)                                                                                                                         | 2017             | Non-Hodgkin's lymphoma | Self-reported exposure         | Self-reported exposure          | Prospective cohort        | Farmers (as insured by MSA in France)       | 98794       | 367             |                    | 48                      | Pesticide use on crops (yes versus no)                                                                                                                                              | SIR          | 1.10          | 0.81     | 1.45     | Pesticides in general | USA            |
| Burns 2011. AI             | Cancer incidence of 2,4-D production workers                                                                                                                                     | 2011             | Non-Hodgkin's lymphoma | Job title                      | Group-based assessment          | Retrospective cohort      | Pesticide manufacturers (male)              | 1256        | 14              |                    | 14                      | Pesticide manufacturers versus rates for white males as comparison.                                                                                                                 | SIR          | 1.36          | 0.74     | 2.29     | 2,4D                  | USA            |
| Wiklund 1987. Class        | Risk of malignant lymphoma in Swedish pesticide applicators                                                                                                                      | 1987             | Non-Hodgkin's lymphoma | Self-reported job history      | Group-based assessment          | Prospective cohort        | Pesticide applicators (mainly agricultural) | 20245       | 21              |                    | 12                      | Number of years since pesticide license. Highest category >10 years. Standardized incidence rates calculated for number of years since obtained pesticide license.                  | SIR          | 1.16          | 0.60     | 2.02     | Phenoxy herbicides    | Sweden         |
| Kristensen 1996. M. GenP   | Incidence and risk factors of cancer among men and women in Norwegian agriculture                                                                                                | 1996             | Non-Hodgkin's lymphoma | Job title                      | Group-based assessment          | Prospective cohort        | Farmers                                     | 66080       | 69              | NA                 | 69                      | Incidence rates for working as a farmer compared with rural reference population.                                                                                                   | SIR          | 0.82          | 0.64     | 1.03     | Pesticides in general | Norway         |
| Kristensen 1996. W. GenP   | Incidence and risk factors of cancer among men and women in Norwegian agriculture                                                                                                | 1996             | Non-Hodgkin's lymphoma | Job title                      | Group-based assessment          | Prospective cohort        | Farmers                                     | 30218       | 20              | NA                 | 20                      | Incidence rates for working as a farmer compared with rural reference population.                                                                                                   | SIR          | 1.04          | 0.64     | 1.56     | Pesticides in general | Norway         |
| Kogevinas 1995. Class      | Soft tissue sarcoma and non-Hodgkin's lymphoma in workers exposed to phenoxy herbicides, chlorophenols, and dioxins: two nested case-control studies                             | 1995             | Non-Hodgkin's lymphoma | Expert case-by-case assessment | Expert-level assessment         | Nested Case-control study | Pesticide manufacturers                     | 21183       | 32              |                    | 7                       | Level of exposure by categories (nonexposed, low, medium, high). Cumulative exposure lagged 5 years.                                                                                | OR           | 1.36          | 0.46     | 4.03     | Phenoxy herbicides    | International  |
| Hardell 2002. SRE. Type    | Exposure to pesticides as risk factor for non-Hodgkin's lymphoma and hairy cell leukemia: pooled analysis of two Swedish case-control studies                                    | 2002             | Non-Hodgkin's lymphoma | Self-reported exposure         | Self-reported exposure          | Case-control study        | Cases from cancer registries                | 1656        | 515             | 1141               | 18                      | Exposed versus non-exposed. Minimum exposure of 8 hours (one working day). Medium-high cumulative exposure versus none.                                                             | OR           | 2.02          | 0.97     | 4.23     | Fungicides            | Sweden         |
| Ferri 2017. JEM. AI        | Risk of lymphoma subtypes by occupational exposure in Southern Italy                                                                                                             | 2017             | Non-Hodgkin's lymphoma | Job exposure matrix            | Expert-level assessment         | Case-control study        | Population base                             | 310         | 128             | 76                 | 7                       | Agricultural worker versus not agricultural worker                                                                                                                                  | OR           | 1.27          | 0.3      | 5.41     | Paraquat              | Italy          |
| Ferri 2017. JT. GenP       | Risk of lymphoma subtypes by occupational exposure in Southern Italy                                                                                                             | 2017             | Non-Hodgkin's lymphoma | Self-reported job history      | Group-based assessment          | Case-control study        | Population base                             | 310         | 117             | 72                 | 14                      | Ever versus never exposure.                                                                                                                                                         | OR           | 2.7           | 0.7      | 10.1     | Pesticides in general | Italy          |
| Balasubramaniam 2013. GenP | Case-control study of risk factors for Non-Hodgkin lymphoma in Mumbai, India                                                                                                     | 2013             | Non-Hodgkin's lymphoma | Self-reported exposure         | Self-reported exposure          | Case-control study        | Hospital base                               | 1771        | 388             | 1383               | 29                      | Duration of exposure. High exposure is defined as >median number of years for exposed subjects.                                                                                     | OR           | 6.1           | 3.3      | 11.2     | Pesticides in general | Canada         |
| Zakerinia 2012. GenP       | The relationship between exposure to pesticides and the occurrence of lymphoid neoplasm                                                                                          | 2012             | Non-Hodgkin's lymphoma | Job title                      | Group-based assessment          | Case-control study        | Hospital base                               | 400         | 200             | 200                | 34                      | Ever exposure to pesticides                                                                                                                                                         | OR           | 2.12          | 1.2      | 3.7      | Pesticides in general | Iran           |
| Wong 2010. SRE. Type       | A hospital-based case-control study of non-Hodgkin lymphoid neoplasms in Shanghai: analysis of environmental and occupational risk factors by subtypes of the WHO classification | 2010             | Non-Hodgkin's lymphoma | Self-reported exposure         | Self-reported exposure          | Case-control study        | Hospital base                               | 1947        | 649             | 1298               | 25                      |                                                                                                                                                                                     |              |               |          |          | Herbicides            | China          |

| Article                      | Article name                                                                                                                                                                            | Publication year | Health outcome         | Exposure assessment method     | Exposure assessment method type | Study design       | Study population         | Sample size | Number of cases | Number of controls | Number of exposed cases | Exposure definition and comparison                                                                                                                                                                                                                                         | Risk measure | Risk estimate | Lower CI | Upper CI              | Type of pesticide     | Study location |
|------------------------------|-----------------------------------------------------------------------------------------------------------------------------------------------------------------------------------------|------------------|------------------------|--------------------------------|---------------------------------|--------------------|--------------------------|-------------|-----------------|--------------------|-------------------------|----------------------------------------------------------------------------------------------------------------------------------------------------------------------------------------------------------------------------------------------------------------------------|--------------|---------------|----------|-----------------------|-----------------------|----------------|
| Wong 2010. JT. Type          | A hospital-based case-control study of non-Hodgkin lymphoid neoplasms in Shanghai: analysis of environmental and occupational risk factors by subtypes of the WHO classification        | 2010             | Non-Hodgkin's lymphoma | Job title                      | Group-based assessment          | Case-control study | Hospital base            | 1947        | 649             | 1298               | 195                     | Farmworker (all types)                                                                                                                                                                                                                                                     | OR           | 1.43          | 1.14     | 1.78                  | Pesticides in general | China          |
| Orsi 2009. GenP              | Occupational exposure to pesticides and lymphoid neoplasms among men: results of a French case-control study                                                                            | 2009             | Non-Hodgkin's lymphoma | Expert case-by-case assessment | Expert-level assessment         | Case-control study | Hospital base            | 680         | 244             | 436                | 32                      | Cumulative exposure defined as the product of cumulative hours worked in each exposed job, and the respective exposure intensity and probability scores. Use of pesticides for crops at least once per week                                                                | OR           | 1.5           | 0.9      | 2.5                   | Pesticides in general | France         |
| Richardson 2008. Type        | Occupational risk factors for non-Hodgkin's lymphoma: a population-based case-control study in Northern Germany                                                                         | 2008             | Non-Hodgkin's lymphoma | Job exposure matrix            | Expert-level assessment         | Case-control study | Population base          | 767         | 242             | 525                | 23                      | Number of dipped sheep (200-683). Proxy for the highest exposed.                                                                                                                                                                                                           | OR           | 2.08          | 1.15     | 3.77                  | Herbicides            | Germany        |
| Orsi 2007. GenP              | Occupation and lymphoid malignancies: results from a French case-control study                                                                                                          | 2007             | Non-Hodgkin's lymphoma | Self-reported exposure         | Self-reported exposure          | Case-control study | Hospital base            | 1100        | 399             | 701                | 14                      | Probability of use >low and lack of protective equipment                                                                                                                                                                                                                   | OR           | 3.6           | 1.5      | 8.6                   | Pesticides in general | France         |
| Rafinsson 2006. AI           | Risk of non-Hodgkin's lymphoma and exposure to hexachlorocyclohexane, a nested case-control study                                                                                       | 2006             | Non-Hodgkin's lymphoma | Registers                      | Group-based assessment          | Case-control study | Sheep owners             | 266         | 45              | 221                | 15                      | Substantial exposure versus none exposure.                                                                                                                                                                                                                                 | OR           | 3.44          | 1.31     | 9.04                  | Hexachlorocyclohexane | Iceland        |
| Miligi 2006. AI              | Cancer and pesticides: an overview and some results of the Italian multicenter case-control study on hematolymphopoietic malignancies.                                                  | 2006             | Non-Hodgkin's lymphoma | Expert case-by-case assessment | Expert-level assessment         | Case-control study | Population base          | 2377        | 1145            | 1232               | 9                       | The distribution of the 15 most commonly used pesticides (in pounds of active ingredient applied in counties where farm workers were employed) was examined, and cut points were created to construct categories in dichotomies of low versus high use or tertiles of use. | OR           | 4.4           | 1.1      | 29.1                  | 2.4D                  | Italy          |
| Fritschi 2005. GenP          | Occupational exposure to pesticides and risk of non-Hodgkin's lymphoma                                                                                                                  | 2005             | Non-Hodgkin's lymphoma | Expert case-by-case assessment | Expert-level assessment         | Case-control study | Population base          | 1388        | 694             | 694                | 26                      | Ever versus never use. Highest number of years in any occupation with pesticide exposure. Applied pesticides on a farm (yes-no)                                                                                                                                            | OR           | 3.09          | 1.42     | 6.70                  | Pesticides in general | Australia      |
| Mills 2005. AI               | Lymphohematopoietic cancers in the United Farm Workers of America (UFW), 1988-2001                                                                                                      | 2005             | Non-Hodgkin's lymphoma | Registers                      | Group-based assessment          | Case-control study | Members of farmers union | 360         | 60              | 300                | 60                      | OR                                                                                                                                                                                                                                                                         | 3.8          | 1.85          | 7.81     | 2.4D                  | USA                   |                |
| Chiu 2004. Type              | Agricultural pesticide use, familial cancer, and risk of non-Hodgkin lymphoma                                                                                                           | 2004             | Non-Hodgkin's lymphoma | Self-reported exposure         | Self-reported exposure          | Case-control study | Population base          | 3790        | 937             | 2853               | 77                      | OR                                                                                                                                                                                                                                                                         | 1.3          | 1.0           | 1.8      | Fungicides            | USA                   |                |
| Kato 2004. JT. GenP          | Pesticide product use and risk of non-Hodgkin lymphoma in women                                                                                                                         | 2004             | Non-Hodgkin's lymphoma | Job title                      | Group-based assessment          | Case-control study | Population base          | 839         | 376             | 463                | 27                      | OR                                                                                                                                                                                                                                                                         | 1.8          | 0.93          | 3.48     | Pesticides in general | USA                   |                |
| Kato 2004. SRE. GenP         | Pesticide product use and risk of non-Hodgkin lymphoma in women                                                                                                                         | 2004             | Non-Hodgkin's lymphoma | Self-reported exposure         | Self-reported exposure          | Case-control study | Population base          | 839         | 376             | 463                | 43                      | OR                                                                                                                                                                                                                                                                         | 1.18         | 0.59          | 2.38     | Pesticides in general | USA                   |                |
| Briggs 2003. Afr. Am. GenP   | Occupational risk factors for selected cancers among African American and White men in the United States                                                                                | 2003             | Non-Hodgkin's lymphoma | Self-reported exposure         | Self-reported exposure          | Case-control study | Population base          | 2073        | 66              | 132                | 5                       | OR                                                                                                                                                                                                                                                                         | 1.2          | 0.4           | 4.0      | Pesticides in general | USA                   |                |
| Briggs 2003. White. GenP     | Occupational risk factors for selected cancers among African American and White men in the United States                                                                                | 2003             | Non-Hodgkin's lymphoma | Self-reported exposure         | Self-reported exposure          | Case-control study | Population base          | 2073        | 893             | 1488               | 92                      | OR                                                                                                                                                                                                                                                                         | 0.9          | 0.6           | 1.7      | Pesticides in general | USA                   |                |
| Fabbro-Peray 2001. SRE. GenP | Environmental risk factors for non-Hodgkin's lymphoma: a population-based case-control study in Languedoc-Roussillon, France                                                            | 2001             | Non-Hodgkin's lymphoma | Self-reported exposure         | Self-reported exposure          | Case-control study | Population base          | 1470        | 445             | 1025               | 41                      | Handling of pesticides                                                                                                                                                                                                                                                     | OR           | 1.0           | 0.7      | 1.6                   | Pesticides in general | France         |
| Fabbro-Peray 2001. JT. GenP  | Environmental risk factors for non-Hodgkin's lymphoma: a population-based case-control study in Languedoc-Roussillon, France                                                            | 2001             | Non-Hodgkin's lymphoma | Self-reported job history      | Self-reported exposure          | Case-control study | Population base          | 1470        | 445             | 1025               | 40                      | Agricultural occupation                                                                                                                                                                                                                                                    | OR           | 1.5           | 0.9      | 2.3                   | Pesticides in general | France         |
| Fritschi 1996. GenP          | Lymphoma, myeloma and occupation: results of a case-control study                                                                                                                       | 1996             | Non-Hodgkin's lymphoma | Expert case-by-case assessment | Expert-level assessment         | Case-control study | Population base          | 1358        | 215             | NA                 | 6                       | Degree of exposure: non-exposed, non-substantial, substantial exposure.                                                                                                                                                                                                    | OR           | 0.9           | 0.4      | 2.3                   | Pesticides in general | Canada         |
| Nanni 1996. CEM. AI          | Chronic lymphocytic leukaemias and non-Hodgkin's lymphomas by histological type in farming-animal breeding workers: a population case-control study based on a priori exposure matrices | 1996             | Non-Hodgkin's lymphoma | Crop exposure matrix           | Expert-level assessment         | Case-control study | Farmers                  | 1164        | 187             | 977                | 28                      | Exposure to DDT according to crop exposure matrix.                                                                                                                                                                                                                         | OR           | 1.70          | 0.91     | 3.17                  | DDT                   | Italy          |
| Nanni 1996. SRE. AI          | Chronic lymphocytic leukaemias and non-Hodgkin's lymphomas by histological type in farming-animal breeding workers: a population case-control study based on a priori exposure matrices | 1996             | Non-Hodgkin's lymphoma | Self-reported exposure         | Self-reported exposure          | Case-control study | Farmers                  | 1164        | 187             | 977                | 27                      | Exposure to DDT (yes/no)                                                                                                                                                                                                                                                   | OR           | 1.74          | 0.93     | 3.27                  | DDT                   | Italy          |

| Article                          | Article name                                                                                                                                                                                    | Publication year | Health outcome         | Exposure assessment method     | Exposure assessment method type | Study design         | Study population                                  | Sample size | Number of cases | Number of controls | Number of exposed cases | Exposure definition and comparison                                                                           | Risk measure | Risk estimate | Lower CI | Upper CI | Type of pesticide     | Study location |
|----------------------------------|-------------------------------------------------------------------------------------------------------------------------------------------------------------------------------------------------|------------------|------------------------|--------------------------------|---------------------------------|----------------------|---------------------------------------------------|-------------|-----------------|--------------------|-------------------------|--------------------------------------------------------------------------------------------------------------|--------------|---------------|----------|----------|-----------------------|----------------|
| Hardell 1994. GenP               | Exposure to phenoxycetic acids, chlorophenols, or organic solvents in relation to histopathology, stage, and anatomical localization of non-Hodgkin's lymphoma.                                 | 1994             | Non-Hodgkin's lymphoma | Job title                      | Group-based assessment          | Case-control study   | Hospital base                                     | 94          | 20              | 74                 | 20                      | Farmer (yes/no)                                                                                              | OR           | 0.7           | 0.4      | 1.4      | Pesticides in general | Sweden         |
| Woods 1989. JT. GenP             | Non-Hodgkin's lymphoma among phenoxy herbicide-exposed farm workers in western Washington state                                                                                                 | 1989             | Non-Hodgkin's lymphoma | Self-reported job history      | Group-based assessment          | Case-control study   | Agricultural workers                              | 377         | 181             | 196                | 181                     | Duration of work as a farmer.                                                                                | OR           | 0.92          | 0.5      | 1.6      | Pesticides in general | USA            |
| Woods 1989. SRE.AI               | Non-Hodgkin's lymphoma among phenoxy herbicide-exposed farm workers in western Washington state                                                                                                 | 1989             | Non-Hodgkin's lymphoma | Self-reported exposure         | Self-reported exposure          | Case-control study   | Agricultural workers                              | 377         | 181             | 196                | NA                      | Regular work with DDT (yes/no)                                                                               | OR           | 1.68          | 0.9      | 3.3      | DDT                   | USA            |
| Lerro 2019. Private. JT. GenP    | Cancer incidence in the Agricultural Health Study after 20 years of follow-up                                                                                                                   | 2019             | Prostate cancer        | Job title                      | Group-based assessment          | Prospective cohort   | Pesticide applicators (private) (agricultural)    | 51165       | 3169            |                    | 3169                    | Incidence rates of prostate cancer for private applicators compared with rates for other cancers.            | SIR          | 1.15          | 1.11     | 1.19     | Pesticides in general | USA            |
| Lerro 2019. Commercial. JT. GenP | Cancer incidence in the Agricultural Health Study after 20 years of follow-up                                                                                                                   | 2019             | Prostate cancer        | Job title                      | Group-based assessment          | Prospective cohort   | Pesticide applicators (commercial) (agricultural) | 4708        | 149             |                    | 149                     | Incidence rates of prostate cancer for commercial applicators compared with rates for other cancers.         | SIR          | 1.02          | 0.86     | 1.19     | Pesticides in general | USA            |
| Kachuri 2017. GenP               | Cancer risks in a population-based study of 70,570 agricultural workers; results from the Canadian census health and Environment cohort (CanGHEC)                                               | 2017             | Prostate cancer        | Job title                      | Group-based assessment          | Retrospective cohort | Agricultural workers                              | 70570       | 2625            |                    | 2625                    | Agricultural work compared with other employed members of the cohort.                                        | HR           | 1.11          | 1.06     | 1.16     | Pesticides in general | Canada         |
| Lemarchand 2017. JT. GenP        | Cancer incidence in the AGRICAN cohort study (2005-2011)                                                                                                                                        | 2017             | Prostate cancer        | Self-reported job history      | Group-based assessment          | Prospective cohort   | Farmers                                           | 98794       | 2538            |                    | 2032                    | Work on farm (yes/no).                                                                                       | SIR          | 1.07          | 1.03     | 1.12     | Pesticides in general | France         |
| Lemarchand 2017. SRE. GenP       | Cancer incidence in the AGRICAN cohort study (2005-2011)                                                                                                                                        | 2017             | Prostate cancer        | Self-reported exposure         | Self-reported exposure          | Prospective cohort   | Farmers                                           | 98794       | 2538            |                    | 1345                    | Pesticide use on crops (yes versus no).                                                                      | SIR          | 1.09          | 1.03     | 1.15     | Pesticides in general | France         |
| Burns 2011. AI                   | Cancer incidence of 2,4-D production workers                                                                                                                                                    | 2011             | Prostate cancer        | Job title                      | Group-based assessment          | Prospective cohort   | Pesticide manufacturers (male)                    | 1108        | 62              |                    | 62                      | Pesticide manufacturers versus rates for white males as comparison.                                          | SIR          | 0.74          | 0.57     | 0.94     | 2,4D                  | USA            |
| Boers 2004. GenP                 | The influence of occupational exposure to pesticides, polycyclic aromatic hydrocarbons, diesel exhaust, metal dust, metal fumes, and mineral oil on prostate cancer: a prospective cohort study | 2005             | Prostate cancer        | Expert case-by-case assessment | Expert-level assessment         | Prospective cohort   | Population base                                   | 58279       | 1376            |                    | 27                      | Cumulative exposure. Third tertile versus no exposure.                                                       | RR           | 0.60          | 0.37     | 0.95     | Pesticides in general | Netherlands    |
| Fleming 1999. GenP               | Cancer incidence in a cohort of licensed pesticide applicators in Florida                                                                                                                       | 1999             | Prostate cancer        | Pesticide licence              | Group-based assessment          | Retrospective cohort | Pesticide applicators                             | 33658       | 353             |                    | 353                     | Incidence rates for applicators compared with that of the Florida general population.                        | SIR          | 1.91          | 1.72     | 2.13     | Pesticides in general | USA            |
| Dich 1998. GenP                  | Prostate cancer in pesticide applicators in Swedish agriculture                                                                                                                                 | 1998             | Prostate cancer        | Pesticide licence              | Group-based assessment          | Retrospective cohort | Pesticide applicators (agricultural)              | 20025       | 401             |                    | 401                     | Incidence rates in applicators versus expected rate in Swedish male population.                              | SIR          | 1.13          | 1.02     | 1.24     | Pesticides in general | Sweden         |
| Frost 2011. GenP                 | Mortality and cancer incidence among British agricultural pesticide users                                                                                                                       | 2011             | Prostate cancer        | Pesticide licence              | Group-based assessment          | Prospective cohort   | Certified pesticide users (agricultural)          | 65910       | 205             |                    | 205                     | Incidence rates in applicators versus that in the Great Britain population.                                  | SIR          | 1.07          | 0.93     | 1.22     | Pesticides in general | Great Britain  |
| Rafnsson 2006. AI                | Cancer incidence among farmers exposed to lindane while sheep dipping                                                                                                                           | 2006             | Prostate cancer        | Registers                      | Group-based assessment          | Retrospective cohort | Sheep owners                                      | 8311        | 541             |                    | 541                     | Incidence rates in sheep owners versus that of the Icelandic male and female population.                     | SIR          | 0.92          | 0.85     | 1.00     | Lindane               | Iceland        |
| Lyngø 1998. GenP                 | Cancer incidence in Danish phenoxy herbicide workers, 1947-1993                                                                                                                                 | 1998             | Prostate cancer        | Registers                      | Group-based assessment          | Retrospective cohort | Pesticide manufacturers                           | 2119        | 15              |                    | 15                      | Workers exposure classified based on their work area listed in personnel files.                              | SIR          | 1.00          | 0.6      | 1.7      | Pesticides in general | Denmark        |
| Zhong 1996. GenP                 | Cancer incidence among Icelandic pesticide users                                                                                                                                                | 1996             | Prostate cancer        | Pesticide licence              | Group-based assessment          | Prospective cohort   | Certified pesticide users                         | 2449        | 10              |                    | 10                      | Incidence rates in pesticide users versus that of Icelanding male and female population.                     | SIR          | 0.70          | 0.33     | 1.29     | Pesticides in general | Iceland        |
| Kristensen 1996. GenP            | Incidence and risk factors of cancer among men and women in Norwegian agriculture                                                                                                               | 1996             | Prostate cancer        | Job title                      | Group-based assessment          | Retrospective cohort | Farmers                                           | 66080       | 129             |                    | 129                     | Incidence rates in farmers versus in the rural population of Norway.                                         | SIR          | 0.90          | 0.75     | 1.07     | Pesticides in general | Norway         |
| Hessel 2004. AI                  | A nested case-control study of prostate cancer and atrazine exposure                                                                                                                            | 2004             | Prostate cancer        | Expert case-by-case assessment | Expert-level assessment         | Nested case-control  | Population base                                   | 142         | 12              | 130                | 12                      | Cumulative exposure applied as continuous variable.                                                          | OR           | 1.01          | 0.95     | 1.07     | Atrazine              | USA            |
| Mills 2003. AI                   | Prostate cancer risk in California farm workers                                                                                                                                                 | 2003             | Prostate cancer        | Registers                      | Group-based assessment          | Nested case-control  | Farmers                                           | 1332        | 222             | 1110               | 33                      | Exposure according to quartiles of chemical use according to a pesticide use reporting system in California. | OR           | 2.37          | 1.22     | 4.61     | Lindane               | USA            |
| Band 2011. AI                    | Prostate cancer risk and exposure to pesticides in British Columbia farmers                                                                                                                     | 2011             | Prostate cancer        | Job exposure matrix            | Expert-level assessment         | Case-control study   | Farmers                                           | 5152        | 1153            | 3999               | 14                      | Cumulative exposure above median compared with no exposure.                                                  | OR           | 2.31          | 1.09     | 4.88     | MCPA                  | Canada         |

| Article                   | Article name                                                                                                              | Publication year | Health outcome      | Exposure assessment method     | Exposure assessment method type | Study design         | Study population                                                 | Sample size | Number of cases | Number of controls | Number of exposed cases | Exposure definition and comparison                                                                      | Risk measure | Risk estimate | Lower CI | Upper CI | Type of pesticide         | Study location |
|---------------------------|---------------------------------------------------------------------------------------------------------------------------|------------------|---------------------|--------------------------------|---------------------------------|----------------------|------------------------------------------------------------------|-------------|-----------------|--------------------|-------------------------|---------------------------------------------------------------------------------------------------------|--------------|---------------|----------|----------|---------------------------|----------------|
| Fritschi 2007. GenP       | Occupational risk factors for prostate cancer and benign prostatic hyperplasia: a case-control study in Western Australia | 2007             | Prostate cancer     | Expert case-by-case assessment | Expert-level assessment         | Case-control study   | Population base                                                  | 1008        | 606             | 402                | 68                      | Non-substantial exposure to any pesticides versus not exposed.                                          | OR           | 1.02          | 0.69     | 1.50     | Pesticides in general     | Australia      |
| Pavuk 2006. Type          | Prostate cancer in US Air Force veterans of the Vietnam war                                                               | 2006             | Prostate cancer     | Biomonitoring (blood)          | Biomonitoring                   | Retrospective cohort | US Air Force veterans                                            | 2578        | 62              | 2516               | 28                      | Highest cumulative exposure versus lowest.                                                              | RR           | 1.32          | 0.75     | 2.34     | Herbicides (Agent Orange) | USA            |
| Meyer 2007. GenP          | A case-control study of farming and prostate cancer in African-American and Caucasian men                                 | 2007             | Prostate cancer     | Self-reported exposure         | Self-reported exposure          | Case-control study   | Population base                                                  | 797         | 405             | 392                | 177                     | Farmers who ever mixed/applied pesticides versus non-farmers.                                           | OR           | 1.6           | 1.2      | 2.2      | Pesticides in general     | USA            |
| Settimi 2003. Class       | Prostate cancer and exposure to pesticides in agricultural settings                                                       | 2003             | Prostate cancer     | Expert case-by-case assessment | Expert-level assessment         | Case-control study   | Hospital base                                                    | 783         | 124             | 659                | 10                      | Duration of exposure. More than 15 years of exposure versus non-exposed farmers and non-farmers.        | OR           | 2.7           | 1.2      | 6.3      | Organochlorine pesticides | Italy          |
| Van der Gulden 1995. GenP | Work environment and prostate cancer risk                                                                                 | 1995             | Prostate cancer     | Self-reported exposure         | Self-reported exposure          | Case-control study   | Cases from cancer registries                                     | 2341        | 469             | 1872               | 22                      | Frequently exposed versus non-exposed. Substantial level of exposure compared with unexposed farmers.   | OR           | 1.47          | 0.88     | 2.46     | Pesticides in general     | Netherlands    |
| Parent 2009. GenP         | Does exposure to agricultural chemicals increase the risk of prostate cancer among farmers?                               | 2009             | Prostate cancer     | Expert case-by-case assessment | Expert-level assessment         | Case-control study   | Farmers                                                          | 124         |                 |                    | 17                      | Exposure to pesticides (yes versus no).                                                                 | OR           | 2.3           | 1.1      | 5.1      | Pesticides in general     | Canada         |
| Subahir 2009. GenP        | Risk factors for prostate cancer in Universiti Kebangsaan Malaysia Medical Centre: a case-control study                   | 2009             | Prostate cancer     | Self-reported exposure         | Self-reported exposure          | Case-control study   | Hospital base                                                    | 224         | 112             | 112                | 9                       | High exposure versus no exposure.                                                                       | OR           | 5.57          | 1.74     | 17.8     | Pesticides in general     | Malaysia       |
| Strom 2008. GenP          | Prostate cancer in Mexican-Americans: identification of risk factors                                                      | 2008             | Prostate cancer     | Job exposure matrix            | Expert-level assessment         | Case-control study   | Population base                                                  | 350         | 176             | 174                | 48                      | Substantial pesticide exposure versus exposure in pool of cancer controls and population controls.      | OR           | 3.44          | 1.84     | 6.44     | Pesticides in general     | USA            |
| Aronson 1996. GenP        | Occupational risk factors for prostate cancer: results from a case-control study in Montreal, Quebec, Canada              | 1996             | Prostate cancer     | Expert case-by-case assessment | Expert-level assessment         | Case-control study   | Population base                                                  | 1999        | 449             | 1550               | 19                      | Pesticide use (yes versus no).                                                                          | OR           | 1.09          | 0.57     | 2.08     | Pesticides in general     | Canada         |
| Ewings 1996. GenP         | A case-control study of cancer of the prostate in Somerset and east Devon                                                 | 1996             | Prostate cancer     | Self-reported exposure         | Self-reported exposure          | Case-control study   | Hospital base                                                    | 146         | 40              | 106                | 15                      | Plantation work versus no plantation work.                                                              | OR           | 0.63          | 0.28     | 1.42     | Pesticides in general     | Great Britain  |
| Petrovitch 2002. GenP     | Plantation work and risk of Parkinson disease in a population-based longitudinal study                                    | 2002             | Parkinson's disease | Self-reported job history      | Group-based assessment          | Prospective cohort   | Honolulu Health Program cohort.                                  | 7986        | 116             |                    | 12                      | Farmer exposed to pesticides versus unexposed non-farmer.                                               | RR           | 1.9           | 1.00     | 3.5      | Pesticides in general     | USA            |
| Ascherio 2006. GenP       | Pesticide exposure and risk for Parkinson's disease                                                                       | 2006             | Parkinson's disease | Self-reported exposure         | Self-reported exposure          | Prospective cohort   | Participants of the Cancer Prevention Study II Nutrition Cohort. | 143325      | 30              |                    | 13                      | Highest number of lifetime days of ever use of pesticides compared with lowest number of lifetime days. | RR           | 1.6           | 0.9      | 2.7      | Pesticides in general     | USA            |
| Shrestha 2020. GenP       | Pesticide use and incident Parkinson's disease in a cohort of farmers and their spouses                                   | 2020             | Parkinson's disease | Self-reported exposure         | Self-reported exposure          | Prospective cohort   | Male pesticide applicators in AHS.                               | 66110       | 183             |                    | 82                      | Occupational pesticide exposure according to job-exposure-matrix.                                       | RR           | 0.79          | 0.59     | 1.06     | Pesticides in general     | USA            |
| Baldi 2003b. M. GenP      | Neurodegenerative Diseases and Exposure to Pesticides in the elderly                                                      | 2003             | Parkinson's disease | Job exposure matrix            | Expert-level assessment         | Prospective cohort   | Elderly French population                                        | 1507        | 10              |                    | NA                      | Occupational pesticide exposure according to job-exposure-matrix.                                       | RR           | 5.63          | 1.47     | 21.57    | Pesticides in general     | France         |
| Baldi 2003b. W. GenP      | Neurodegenerative Diseases and Exposure to Pesticides in the elderly                                                      | 2003             | Parkinson's disease | Job exposure matrix            | Expert-level assessment         | Prospective cohort   | Elderly French population                                        | 1507        | 14              |                    | NA                      | Highest exposure probability level of pesticide exposure versus the lowest.                             | RR           | 1.02          | 0.22     | 4.82     | Pesticides in general     | France         |
| Feldman 2011. GenP        | Occupational exposure in parkinsonian disorders: a 43-year prospective cohort study in men                                | 2011             | Parkinson's disease | Job exposure matrix            | Expert-level assessment         | Prospective cohort   | Population base                                                  | 14169       | 204             |                    | 21                      | Hospitalization rate due to Parkinson's disease in gardeners versus that of the general population.     | HR           | 0.9           | 0.5      | 1.4      | Pesticides in general     | Sweden         |
| Kenborg 2012. GenP        | Parkinson's disease among gardeners exposed to pesticides—a Danish cohort study                                           | 2012             | Parkinson's disease | Job title                      | Group-based assessment          | Retrospective cohort | Professional male gardeners                                      | 3124        | 28              |                    | 28                      | Highest duration of use versus unexposed.                                                               | SHR          | 1.14          | 0.76     | 1.65     | Pesticides in general     | Denmark        |
| Pouchieu 2018. AI         | Pesticide use in agriculture and Parkinson's disease in the AGRICAN cohort study                                          | 2018             | Parkinson's disease | Crop exposure matrix           | Expert-level assessment         | Prospective cohort   | Farmers                                                          | 149810      | 1732            | 148078             | 28                      | All men and women in agriculture and horticulture.                                                      | OR           | 1.58          | 0.48     | 5.25     | Maneb                     | France         |
| Tuchsen 2000. GenP        | Agricultural work and the risk of Parkinson's disease in Denmark, 1981-1993                                               | 2000             | Parkinson's disease | Job title                      | Group-based assessment          | Prospective cohort   | Agricultural workers                                             | 128935      | 134             |                    | 134                     | Pesticide use (yes versus no).                                                                          | SHR          | 1.32          | 1.11     | 1.56     | Pesticides in general     | Denmark        |
| Koller 1990. GenP         | Environmental risk factors in Parkinson's disease                                                                         | 1990             | Parkinson's disease | Self-reported exposure         | Self-reported exposure          | Case-control study   | hospital_based                                                   | 300         | 150             | 150                | 39                      | Occupational pesticide exposure versus non-exposed.                                                     | OR           | 1.08          | 0.69     | 1.69     | Pesticides in general     | USA            |
| Baldi 2003a. GenP         | Association between Parkinson's disease and exposure to pesticides in southwestern France                                 | 2003             | Parkinson's disease | Job exposure matrix            | Expert-level assessment         | Case-control study   | Inhabitants of agricultural region                               | 336         | 84              | 252                | 19                      | Pesticide exposure in farming versus no pesticide exposure in farming.                                  | OR           | 2.2           | 1.11     | 4.34     | Pesticides in general     | France         |
| Chan 1998. GenP           | Genetic and environmental risk factors for Parkinson's disease in a Chinese population                                    | 1998             | Parkinson's disease | Self-reported exposure         | Self-reported exposure          | Case-control study   | Hospital base                                                    | 528         | 215             | 313                | 19                      | Insecticide applications to farm animals/animal areas.                                                  | OR           | 0.75          | 0.26     | 2.22     | Pesticides in general     | China          |
| Dhillon 2008. Type        | Pesticide/environmental exposures and Parkinson's disease in East Texas                                                   | 2008             | Parkinson's disease | Self-reported exposure         | Self-reported exposure          | Case-control study   | Hospital base                                                    | 184         | 100             | 84                 | 5                       |                                                                                                         | OR           | 4.4           | 0.5      | 38.1     | Insecticides              | USA            |

| Article                      | Article name                                                                                                                            | Publication year | Health outcome      | Exposure assessment method     | Exposure assessment method type | Study design       | Study population                                                            | Sample size | Number of cases | Number of controls | Number of exposed cases | Exposure definition and comparison                                                                                                                        | Risk measure | Risk estimate | Lower CI | Upper CI | Type of pesticide         | Study location |
|------------------------------|-----------------------------------------------------------------------------------------------------------------------------------------|------------------|---------------------|--------------------------------|---------------------------------|--------------------|-----------------------------------------------------------------------------|-------------|-----------------|--------------------|-------------------------|-----------------------------------------------------------------------------------------------------------------------------------------------------------|--------------|---------------|----------|----------|---------------------------|----------------|
| Dick 2007. GenP              | Occupational titles as risk factors for Parkinson's disease                                                                             | 2007             | Parkinson's disease | Job title                      | Group-based assessment          | Case-control study | Population base                                                             | 590         | 170             | 420                | 49                      | Agricultural work (yes versus no) as defined by ISIC.                                                                                                     | OR           | 1.3           | 0.84     | 2.02     | Pesticides in general     | International  |
| Duzcan 2003. GenP            | Familial influence on parkinsonism in a rural area of Turkey (Kizilcabuluk-Denizli): A community-based case-control study               | 2003             | Parkinsonism        | Self-reported exposure         | Self-reported exposure          | Case-control study | Population base                                                             | 144         | 36              | 108                | 15                      | Pesticide exposure (yes versus no)                                                                                                                        | OR           | 2.96          | 1.31     | 6.69     | Pesticides in general     | Turkey         |
| Elbaz 2009. GenP             | Professional exposure to pesticides and Parkinson disease                                                                               | 2009             | Parkinson's disease | Expert case-by-case assessment | Expert-level assessment         | Case-control study | Inhabitants of agricultural region                                          | 781         | 224             | 557                | 19                      | Number of years of professional exposure. More than 38 years of exposure versus no exposure.                                                              | OR           | 2.00          | 1.00     | 3.5      | Pesticides in general     | France         |
| Fall 1999. GenP              | Nutritional and occupational factors influencing the risk of Parkinson's disease: a case-control study in southeastern Sweden           | 1999             | Parkinson's disease | Self-reported exposure         | Self-reported exposure          | Case-control study | Population base                                                             | 376         | 113             | 263                | 10                      | Handling pesticides within any occupation.                                                                                                                | OR           | 3.3           | 1.00     | 10.0     | Pesticides in general     | Sweden         |
| Firestone 2010. JT. M. GenP  | Occupational factors and risk of Parkinson's disease: A population-based case-control study                                             | 2010             | Parkinson's disease | Self-reported job history      | Group-based assessment          | Case-control study | Population base                                                             | 578         | 252             | 326                | 8                       | Pesticide worker compared with subject never exposed.                                                                                                     | OR           | 1.53          | 0.54     | 4.35     | Pesticides in general     | USA            |
| Firestone 2010. SRE. M. GenP | Occupational factors and risk of Parkinson's disease: A population-based case-control study                                             | 2010             | Parkinson's disease | Self-reported exposure         | Self-reported exposure          | Case-control study | Population base                                                             | 578         | 252             | 326                | 12                      | Pesticide exposure compared with subject never exposed.                                                                                                   | OR           | 0.6           | 0.3      | 1.29     | Pesticides in general     | USA            |
| Fong 2007. GenP              | Pesticide exposure on southwestern Taiwanese with MnSOD and NQO1 polymorphisms is associated with increased risk of Parkinson's disease | 2007             | Parkinson's disease | Self-reported exposure         | Self-reported exposure          | Case-control study | Hospital base                                                               | 308         | 153             | 155                | 85                      | Pesticide use (yes versus no).                                                                                                                            | OR           | 1.68          | 1.03     | 2.76     | Pesticides in general     | Taiwan         |
| Frigerio 2006. GenP          | Chemical exposures and Parkinson's disease: a population-based case-control study                                                       | 2006             | Parkinson's disease | Self-reported exposure         | Self-reported exposure          | Case-control study | Population base                                                             | 278         | 149             | 129                | 14                      | Pesticide use in farming (yes versus no).                                                                                                                 | OR           | 1.3           | 0.6      | 3.1      | Pesticides in general     | USA            |
| Gorell 1998. SRE. Type       | The risk of Parkinson's disease with exposure to pesticides, farming, well water, and rural living                                      | 1998             | Parkinson's disease | Self-reported exposure         | Self-reported exposure          | Case-control study | Population base                                                             | 608         | 144             | 464                | NA                      | Ever versus never exposure to herbicides.                                                                                                                 | OR           | 4.1           | 1.37     | 12.24    | Herbicides                | USA            |
| Gorell 1998. JT. GenP        | The risk of Parkinson's disease with exposure to pesticides, farming, well water, and rural living                                      | 1998             | Parkinson's disease | Job title                      | Group-based assessment          | Case-control study | Population base                                                             | 608         | 144             | 464                | NA                      | Farming (yes versus no).                                                                                                                                  | OR           | 2.79          | 1.03     | 7.55     | Pesticides in general     | USA            |
| Hetzman 1994. M. GenP        | A case-control study of Parkinson's disease in a horticultural region of British Columbia                                               | 1994             | Parkinson's disease | Self-reported exposure         | Self-reported exposure          | Case-control study | Population base                                                             | 131         | 71              | 60                 | 33                      | Pesticide use (yes versus no).                                                                                                                            | NA           | 2.32          | 1.1      | 4.88     | Pesticides in general     | Canada         |
| Hetzman 1994. W. GenP        | A case-control study of Parkinson's disease in a horticultural region of British Columbia                                               | 1994             | Parkinson's disease | Self-reported exposure         | Self-reported exposure          | Case-control study | Population base                                                             | 120         | 56              | 64                 | 9                       | Pesticide use (yes versus no).                                                                                                                            | NA           | 1.36          | 0.48     | 3.85     | Pesticides in general     | Canada         |
| Kuopio 1999. Type            | Environmental Risk Factors in Parkinson's Disease                                                                                       | 1999             | Parkinson's disease | Self-reported exposure         | Self-reported exposure          | Case-control study | Population base                                                             | 369         | 123             | 246                | 39                      | Regular and occasional use of herbicides versus regular.                                                                                                  | OR           | 1.02          | 0.63     | 1.65     | Herbicides                | Finland        |
| Liew 2014. GenP              | Job exposure matrix (JEM)-derived estimates of lifetime occupational pesticide exposure and the risk of Parkinson's disease             | 2014             | Parkinson's disease | Job exposure matrix            | Expert-level assessment         | Case-control study | Population base                                                             | 1107        | 357             | 750                | 43                      | High cumulative pesticide exposure versus no exposure.                                                                                                    | OR           | 1.55          | 0.96     | 2.51     | Pesticides in general     | USA            |
| McCann 1998. GenP            | The Epidemiology of Parkinson's Disease in an Australian population                                                                     | 1998             | Parkinson's disease | Self-reported exposure         | Self-reported exposure          | Case-control study | Cases and controls from hospitals, residential cares, and community groups. | 534         | 224             | 310                | NA                      | Exposure to herbicides and pesticides (daily or weekly exposure to industrial herbicides or pesticides for a cumulative period of greater than 6 months). | OR           | 1.2           | 0.8      | 1.5      | Herbicides and pesticides | Australia      |
| Moisan 2015. GenP            | Association of Parkinson's Disease and Its Subtypes with Agricultural Pesticide Exposures in Men: A Case-Control Study in France        | 2015             | Parkinson's disease | Self-reported exposure         | Self-reported exposure          | Case-control study | Farmers                                                                     | 431         | 133             | 298                | 43                      | Highest quartile versus lowest quartile of cumulative exposure (as defined by cumulative number of applications).                                         | OR           | 2.31          | 1.09     | 4.9      | Pesticides in general     | France         |
| Narayan 2017. GenP           | Occupational pesticide use and Parkinson's disease in the Parkinson Environment Gene (PEG) study                                        | 2017             | Parkinson's disease | Self-reported exposure         | Self-reported exposure          | Case-control study | Population base                                                             | 1187        | 360             | 827                | 40                      | Duration of use of pesticides. More than 10 years versus no occupational pesticide use.                                                                   | OR           | 1.69          | 1.01     | 2.83     | Pesticides in general     | USA            |
| Rughier 2011. Exp. GenP      | Pesticide exposure and risk of Parkinson's disease--a population-based case-control study evaluating the potential for recall bias      | 2011             | Parkinson's disease | Expert case-by-case assessment | Expert-level assessment         | Case-control study | Population base                                                             | 808         | 403             | 405                | 37                      | Pesticide exposure beyond background.                                                                                                                     | OR           | 1.51          | 0.85     | 2.69     | Pesticides in general     | Canada         |
| Rughier 2011. SRE. GenP      | Pesticide exposure and risk of Parkinson's disease--a population-based case-control study evaluating the potential for recall bias      | 2011             | Parkinson's disease | Self-reported exposure         | Self-reported exposure          | Case-control study | Population base                                                             | 808         | 403             | 405                | 74                      | Use or exposure to pesticides.                                                                                                                            | OR           | 1.76          | 1.15     | 2.7      | Pesticides in general     | Canada         |
| Semchuk 1992. GenP           | Parkinson's disease and exposure to agricultural work and pesticide chemicals                                                           | 1992             | Parkinson's disease | Self-reported exposure         | Self-reported exposure          | Case-control study | Population base                                                             | 390         | 130             | 260                | NA                      | Pesticide use (yes versus no).                                                                                                                            | OR           | 2.25          | 1.27     | 3.99     | Pesticides in general     | Canada         |
| Tanaka 2011. GenP            | Occupational risk factors for Parkinson's disease: a case-control study in Japan                                                        | 2011             | Parkinson's disease | Self-reported exposure         | Self-reported exposure          | Case-control study | Hospital base                                                               | 618         | 249             | 369                | 15                      | Pesticide exposure (yes versus no).                                                                                                                       | OR           | 0.75          | 0.37     | 1.46     | Pesticides in general     | Japan          |

| Article                      | Article name                                                                               | Publication year | Health outcome      | Exposure assessment method | Exposure assessment method type | Study design       | Study population | Sample size | Number of cases | Number of controls | Number of exposed cases | Exposure definition and comparison                | Risk measure | Risk estimate | Lower CI | Upper CI | Type of pesticide     | Study location |
|------------------------------|--------------------------------------------------------------------------------------------|------------------|---------------------|----------------------------|---------------------------------|--------------------|------------------|-------------|-----------------|--------------------|-------------------------|---------------------------------------------------|--------------|---------------|----------|----------|-----------------------|----------------|
| Tanner 2009, GenP            | Occupation and risk of parkinsonism: a multicenter case-control study                      | 2009             | Parkinsonism        | Self-reported exposure     | Self-reported exposure          | Case-control study | Hospital base    | 1030        | 519             | 511                | 44                      | Pesticide use (yes versus no).                    | OR           | 1.9           | 1.12     | 3.21     | Pesticides in general | USA/Canada     |
| Van der Mark 2014, JEM, GenP | Occupational exposure to pesticides and endotoxin and Parkinson disease in the Netherlands | 2014             | Parkinson's disease | Job exposure matrix        | Expert-level assessment         | Case-control study | Hospital base    | 1320        | 444             | 876                | 38                      | Highest cumulative exposure versus never exposed. | OR           | 1.56          | 0.86     | 2.83     | Pesticides in general | Netherlands    |
| Wright 2005, GenP            | Environmental determinants of Parkinson's disease                                          | 2005             | Parkinson's disease | Self-reported exposure     | Self-reported exposure          | Case-control study | Population base  | 235         | 102             | 133                | 9                       | Occupational pesticide use (yes versus no).       | OR           | 1.2           | 0.3      | 4.8      | Pesticides in general | USA            |

JT=job title. SRE=self-reported exposure. JEM=job-exposure matrix. EXP=expert case-by-case assessment. CEM=crop-exposure matrix. GenP=general pesticides. Type=type of pesticide. AI=active ingredient. Private=private pesticide applicator. Commercial=commercial pesticide applicator. Class=class of pesticides. AI=active ingredient. AfrAm=Afro-American. W=women. M=men. NA=not available.
