# Supplementary material for: Impact of occupational pesticide exposure assessment method on risk estimates for prostate cancer, non-Hodgkin’s lymphoma and Parkinson’s disease: results of three meta-analyses
Source: HighWire-hosted journal article supplement (doi:10.1136/oemed-2021-108046), 2022-04-07
Supplement: oemed-2021-108046supp002_data_supplement.pdf [file oemed-2021-108046supp002_data_supplement.pdf]

**Supplementary File S2.****Reference list and applied exposure assessment methods of included studies.****Prostate cancer**

In total 25 articles were included in the meta-analysis of occupational pesticide exposure and prostate cancer. In these, 27 risk estimates for prostate cancer were reported for the following exposure assessment methods (EAM): job titles (n=5) (1-4), self-reported job histories (n=1) (5), exposure registers (n=3) (6-8), records of pesticide licenses (n=4) (9-12), self-reported exposures (n=5) (5, 13-16), JEM (n=2) (17, 18), expert assessments (n=6) (19-24), and biomonitoring of blood (n=1) (25). One article reported risk estimates for several EAMs applied within the same study population (5), and one article reported separate risk estimates based on job title for private and commercial pesticide applicators (2).

**Non-Hodgkin's Lymphoma**

In total 29 articles were included in the meta-analysis of Non-Hodgkin's Lymphoma. The articles reported 40 risk estimates according to the following EAM: job titles (n=10) (1, 3, 4, 26-30), self-reported job histories (n=4) (31-34), exposure registers (n=3) (7, 8, 35), self-reported exposures (n=13) (5, 28, 30, 32-34, 36-41), JEM (n=2) (31, 42), CEM (n=1) (39), expert assessments (n=6) (43-47), and exposure algorithm (n=1) (48). Four articles reported risk estimates for several different EAMs (28, 31, 32, 39). Three articles reported risk estimates separately for women and men (1, 4, 5), and one article applied self-reported exposures to estimate NHL risk separately for African American and white men, respectively (38).

**Parkinson's disease**

In total 32 articles were included in the meta-analysis of Parkinson's Disease. The articles reported 37 risk estimates according to the following EAM: job titles (n=4) (49-52), self-reported job histories (n=2) (53, 54), self-reported exposures (n=22) (50, 54-72), JEM (n=7) (73-77), and expert assessments (n=2) (64, 78). Three articles reported separate risk estimates for different EAMs (50, 54, 64). Two articles reported risk estimates separately for women and men (59, 73). Two articles (63, 76) presented partly overlapping study populations. However, we extracted risks estimates associated with different types of EAM; JEM in (76) and self-reported use in (63).

## REFERENCES

1. Kachuri L, Harris MA, MacLeod JS, et al. Cancer risks in a population-based study of 70,570 agricultural workers: results from the Canadian census health and Environment cohort (CanCHEC). *BMC Cancer*. 2017;17:343.
2. Lerro CC, Koutros S, Andreotti G, et al. Cancer incidence in the Agricultural Health Study after 20 years of follow-up. *Cancer Causes Control*. 2019;30:311-22. *Cancer Causes Control*. 2019;30:311-22.
3. Burns C, Bodner K, Swaen G, et al. Cancer incidence of 2,4-D production workers. *Int J Environ Res Public Health*. 2011;8:3579-90.
4. Kristensen P, Andersen A, Irgens LM, et al. Incidence and risk factors of cancer among men and women in Norwegian agriculture. *Scand J Work Environ Health*. 1996;22:14-26.
5. Lemarchand C, Tual S, Leveque-Morlais N, et al. Cancer incidence in the AGRICAN cohort study (2005-2011). *Cancer Epidemiol*. 2017;49:175-85.
6. Mills PK, Yang R. Prostate cancer risk in California farm workers. *J Occup Environ Med*. 2003;45:249-58.
7. Rafnsson V. Cancer incidence among farmers exposed to lindane while sheep dipping. *Scand J Work Environ Health*. 2006;32:185-9.
8. Lyng E. Cancer incidence in Danish phenoxy herbicide workers, 1947-1993. *Environmental health perspectives*. 1998;106 Suppl 2:683-8
9. Fleming LE, Bean JA, Rudolph M, et al. Cancer incidence in a cohort of licensed pesticide applicators in Florida. *J Occup Environ Med*. 1999;41:279-88.
10. Frost G, Brown T, Harding AH. Mortality and cancer incidence among British agricultural pesticide users. *Occup Med (Lond)*. 2011;61:303-10.
11. Zhong Y, Rafnsson V. Cancer incidence among Icelandic pesticide users. *International journal of epidemiology*. 1996;25:1117-24.
12. Dich J, Wiklund K. Prostate cancer in pesticide applicators in Swedish agriculture. *Prostate*. 1998;34:100-12.
13. Meyer TE, Coker AL, Sanderson M, et al. A case-control study of farming and prostate cancer in African-American and Caucasian men. *Occup Environ Med*. 2007;64:155-60.
14. van der Gulden JW, Kolk JJ, Verbeek AL. Work environment and prostate cancer risk. *Prostate*. 1995;27:250-7.
15. Subahir MN, Shah SA, Zainuddin ZM. Risk factors for prostate cancer in Universiti Kebangsaan Malaysia Medical Centre: a case-control study. *Asian Pac J Cancer Prev*. 2009;10:1015-20.
16. Ewings P, Bowie C. A case-control study of cancer of the prostate in Somerset and east Devon. *Br J Cancer*. 1996;74:661-6.
17. Band PR, Abanto Z, Bert J, et al. Prostate cancer risk and exposure to pesticides in British Columbia farmers. *Prostate*. 2011;71:168-83.
18. Strom SS, Yamamura Y, Flores-Sandoval FN, et al. Prostate cancer in Mexican-Americans: identification of risk factors. *Prostate*. 2008;68:563-70.
19. Fritschi L, Glass DC, Tabrizi JS, et al. Occupational risk factors for prostate cancer and benign prostatic hyperplasia: a case-control study in Western Australia. *Occup Environ Med*. 2007;64:60-5.
20. Boers D, Zeegers MP, Swaen GM, et al. The influence of occupational exposure to pesticides, polycyclic aromatic hydrocarbons, diesel exhaust, metal dust, metal fumes, and mineral oil on prostate cancer: a prospective cohort study. *Occup Environ Med*. 2005;62:531-7.
21. Hessel PA, Kalmes R, Smith TJ, et al. A nested case-control study of prostate cancer and atrazine exposure. *J Occup Environ Med*. 2004;46:379-85.

22. Settimi L, Masina A, Andrion A. Prostate cancer and exposure to pesticides in agricultural settings. *International journal of cancer*. 2003;104:458-61.
23. Parent ME, Desy M, Siemiatycki J. Does exposure to agricultural chemicals increase the risk of prostate cancer among farmers? *Mcgill J Med*. 2009;12:70-7.
24. Aronson KJ, Siemiatycki J, Dewar R, et al. Occupational risk factors for prostate cancer: results from a case-control study in Montreal, Quebec, Canada. *Am J Epidemiol*. 1996;143:363-73.
25. Pavuk M, Michalek JE, Ketchum NS. Prostate cancer in US Air Force veterans of the Vietnam war. *J Expo Sci Environ Epidemiol*. 2006;16:184-90.
26. Zakerinia M, Namdari M, Amirghofran S. The Relationship between Exposure to Pesticides and the Occurrence of Lymphoid Neoplasm. *Iran Red Crescent Med J*. 2012;14:337-44.
27. Demers PA, Davies HW, Friesen MC, et al. Cancer and occupational exposure to pentachlorophenol and tetrachlorophenol (Canada). *Cancer Causes Control*. 2006;17:749-58.
28. Kato I, Watanabe-Meserve H, Koenig KL, et al. Pesticide product use and risk of non-Hodgkin lymphoma in women. *Environmental health perspectives*. 2004;112:1275-81.
29. Hardell L, Eriksson M, Degerman A. Exposure to phenoxyacetic acids, chlorophenols, or organic solvents in relation to histopathology, stage, and anatomical localization of non-Hodgkin's lymphoma. *Cancer Res*. 1994;54:2386-9.
30. Wong O, Harris F, Armstrong TW, et al. A hospital-based case-control study of non-Hodgkin lymphoid neoplasms in Shanghai: analysis of environmental and occupational risk factors by subtypes of the WHO classification. *Chem Biol Interact*. 2010;184:129-46.
31. Ferri GM, Specchia G, Mazza P, et al. Risk of lymphoma subtypes by occupational exposure in Southern Italy. *J Occup Med Toxicol*. 2017;12:31.
32. Woods JS, Polissar L. Non-Hodgkin's lymphoma among phenoxy herbicide-exposed farm workers in western Washington State. *Chemosphere*. 1989;18:401-6.
33. Fabbro-Peray P, Daures JP, Rossi JF. Environmental risk factors for non-Hodgkin's lymphoma: a population-based case-control study in Languedoc-Roussillon, France. *Cancer Causes Control*. 2001;12:201-12.
34. Wiklund K, Dich J, Holm LE. Risk of malignant lymphoma in Swedish pesticide applicators. *Br J Cancer*. 1987;56:505-8.
35. Mills PK, Yang R, Riordan D. Lymphohematopoietic cancers in the United Farm Workers of America (UFW), 1988-2001. *Cancer Causes Control*. 2005;16:823-30.
36. Orsi L, Troussard X, Monnereau A, et al. Occupation and lymphoid malignancies: results from a French case-control study. *J Occup Environ Med*. 2007;49:1339-50.
37. Chiu BC, Weisenburger DD, Zahm SH, et al. Agricultural pesticide use, familial cancer, and risk of non-Hodgkin lymphoma. *Cancer Epidemiol Biomarkers Prev*. 2004;13:525-31.
38. Briggs NC, Levine RS, Hall HI, et al. Occupational risk factors for selected cancers among African American and White men in the United States. *Am J Public Health*. 2003;93:1748-52.
39. Nanni O, Amadori D, Lugaresi C, et al. Chronic lymphocytic leukaemias and non-Hodgkin's lymphomas by histological type in farming-animal breeding workers: a population case-control study based on a priori exposure matrices. *Occup Environ Med*. 1996;53:652-7.
40. Hardell L, Eriksson M, Nordstrom M. Exposure to pesticides as risk factor for non-Hodgkin's lymphoma and hairy cell leukemia: pooled analysis of two Swedish case-control studies. *Leuk Lymphoma*. 2002;43:1043-9.

41. Balasubramaniam G, Saoba S, Sarade M, et al. Case-control study of risk factors for Non-Hodgkin lymphoma in Mumbai, India. *Asian Pac J Cancer Prev*. 2013;14:775-80.
42. Richardson DB, Terschuren C, Hoffmann W. Occupational risk factors for non-Hodgkin's lymphoma: a population-based case-control study in Northern Germany. *American journal of industrial medicine*. 2008;51:258-68.
43. Orsi L, Delabre L, Monnereau A, et al. Occupational exposure to pesticides and lymphoid neoplasms among men: results of a French case-control study. *Occup Environ Med*. 2009;66:291-8.
44. Miligi L, Costantini AS, Veraldi A, et al. Cancer and pesticides: an overview and some results of the Italian multicenter case-control study on hematolymphopietic malignancies. *Ann N Y Acad Sci*. 2006;1076:366-77.
45. Fritschi L, Benke G, Hughes AM, et al. Occupational exposure to pesticides and risk of non-Hodgkin's lymphoma. *Am J Epidemiol*. 2005;162:849-57.
46. Fritschi L, Siemiatycki J. Lymphoma, myeloma and occupation: results of a case-control study. *International journal of cancer*. 1996;67:498-503.
47. Kogevinas M, Kauppinen T, Winkelmann R, et al. Soft tissue sarcoma and non-Hodgkin's lymphoma in workers exposed to phenoxy herbicides, chlorophenols, and dioxins: two nested case-control studies. *Epidemiology*. 1995;6:396-402.
48. Alavanja MC, Hofmann JN, Lynch CF, et al. Non-hodgkin lymphoma risk and insecticide, fungicide and fumigant use in the agricultural health study. *PLoS One*. 2014;9:e109332.
49. Dick S, Semple S, Dick F, et al. Occupational titles as risk factors for Parkinson's disease. *Occup Med (Lond)*. 2007;57:50-6.
50. Gorell JM, Johnson CC, Rybicki BA, et al. The risk of Parkinson's disease with exposure to pesticides, farming, well water, and rural living. *Neurology*. 1998;50:1346-50.
51. Kenborg L, Lassen CF, Lander F, et al. Parkinson's disease among gardeners exposed to pesticides--a Danish cohort study. *Scand J Work Environ Health*. 2012;38:65-9.
52. Tuchsén F, Jensen AA. Agricultural work and the risk of Parkinson's disease in Denmark, 1981-1993. *Scand J Work Environ Health*. 2000;26:359-62.
53. Petrovitch H, Ross GW, Abbott RD, et al. Plantation work and risk of Parkinson disease in a population-based longitudinal study. *Arch Neurol*. 2002;59:1787-92.
54. Firestone JA, Lundin JI, Powers KM, et al. Occupational factors and risk of Parkinson's disease: A population-based case-control study. *American journal of industrial medicine*. 2010;53:217-23.
55. Chan DK, Woo J, Ho SC, et al. Genetic and environmental risk factors for Parkinson's disease in a Chinese population. *J Neurol Neurosurg Psychiatry*. 1998;65:781-4.
56. Dhillon AS, Tarbutton GL, Levin JL, et al. Pesticide/environmental exposures and Parkinson's disease in East Texas. *J Agromedicine*. 2008;13:37-48.
57. Duzcan F, Zencir M, Ozdemir F, et al. Familial influence on parkinsonism in a rural area of Turkey (Kizilcabolu-Denizli): a community-based case-control study. *Mov Disord*. 2003;18:799-804.
58. Fong CS, Wu RM, Shieh JC, et al. Pesticide exposure on southwestern Taiwanese with MnSOD and NQO1 polymorphisms is associated with increased risk of Parkinson's disease. *Clin Chim Acta*. 2007;378:136-41.
59. Hertzman C, Wiens M, Snow B, et al. A case-control study of Parkinson's disease in a horticultural region of British Columbia. *Mov Disord*. 1994;9:69-75.
60. Kuopio AM, Marttila RJ, Helenius H, et al. Environmental risk factors in Parkinson's disease. *Mov Disord*. 1999;14:928-39.
61. McCann SJ, LeCouteur DG, Green AC, et al. The epidemiology of Parkinson's disease in an Australian population. *Neuroepidemiology*. 1998;17:310-7.

62. Moisan F, Spinosi J, Delabre L, et al. Association of Parkinson's Disease and Its Subtypes with Agricultural Pesticide Exposures in Men: A Case-Control Study in France. *Environmental health perspectives*. 2015;123:1123-9.
63. Narayan S, Liew Z, Bronstein JM, et al. Occupational pesticide use and Parkinson's disease in the Parkinson Environment Gene (PEG) study. *Environment international*. 2017;107:266-73.
64. Rugbjerg K, Harris MA, Shen H, et al. Pesticide exposure and risk of Parkinson's disease--a population-based case-control study evaluating the potential for recall bias. *Scand J Work Environ Health*. 2011;37:427-36.
65. Semchuk KM, Love EJ, Lee RG. Parkinson's disease and exposure to agricultural work and pesticide chemicals. *Neurology*. 1992;42:1328-35.
66. Tanaka K, Miyake Y, Fukushima W, et al. Occupational risk factors for Parkinson's disease: a case-control study in Japan. *BMC Neurol*. 2011;11:83.
67. Tanner CM, Ross GW, Jewell SA, et al. Occupation and risk of parkinsonism: a multicenter case-control study. *Arch Neurol*. 2009;66:1106-13.
68. Wright JM, Keller-Byrne J. Environmental determinants of Parkinson's disease. *Arch Environ Occup Health*. 2005;60:32-8.
69. Fall PA, Fredrikson M, Axelson O, et al. Nutritional and occupational factors influencing the risk of Parkinson's disease: a case-control study in southeastern Sweden. *Mov Disord*. 1999;14:28-37.
70. Ascherio A, Chen H, Weisskopf MG, et al. Pesticide exposure and risk for Parkinson's disease. *Ann Neurol*. 2006;60:197-203.
71. Koller W, Vetere-Overfield B, Gray C, et al. Environmental risk factors in Parkinson's disease. *Neurology*. 1990;40:1218-21.
72. Shrestha S, Parks CG, Umbach DM, et al. Pesticide use and incident Parkinson's disease in a cohort of farmers and their spouses. *Environ Res*. 2020;191:110186.
73. Baldi I, Lebaillly P, Mohammed-Brahim B, et al. Neurodegenerative diseases and exposure to pesticides in the elderly. *Am J Epidemiol*. 2003;157:409-14.
74. Baldi I, Cantagrel A, Lebaillly P, et al. Association between Parkinson's disease and exposure to pesticides in southwestern France. *Neuroepidemiology*. 2003;22:305-10.
75. Feldman AL, Johansson AL, Nise G, et al. Occupational exposure in parkinsonian disorders: a 43-year prospective cohort study in men. *Parkinsonism Relat Disord*. 2011;17:677-82.
76. Liew Z, Wang A, Bronstein J, et al. Job exposure matrix (JEM)-derived estimates of lifetime occupational pesticide exposure and the risk of Parkinson's disease. *Arch Environ Occup Health*. 2014;69:241-51.
77. van der Mark M, Vermeulen R, Nijssen PC, et al. Occupational exposure to pesticides and endotoxin and Parkinson disease in the Netherlands. *Occup Environ Med*. 2014;71:757-64.
78. Elbaz A, Clavel J, Rathouz PJ, et al. Professional exposure to pesticides and Parkinson disease. *Ann Neurol*. 2009;66(4):494-504.
