# Supplementary material for: Impact of occupational pesticide exposure assessment method on risk estimates for prostate cancer, non-Hodgkin’s lymphoma and Parkinson’s disease: results of three meta-analyses
Source: HighWire-hosted journal article supplement (doi:10.1136/oemed-2021-108046), 2022-04-07
Supplement: oemed-2021-108046supp003_data_supplement.pdf [file oemed-2021-108046supp003_data_supplement.pdf]

Supplementary File S3 (figures S3.1-3.12)

Subgroup-analyses by type of exposure assessment method (EAM), study design, publication year period, and geographic location of the studies.

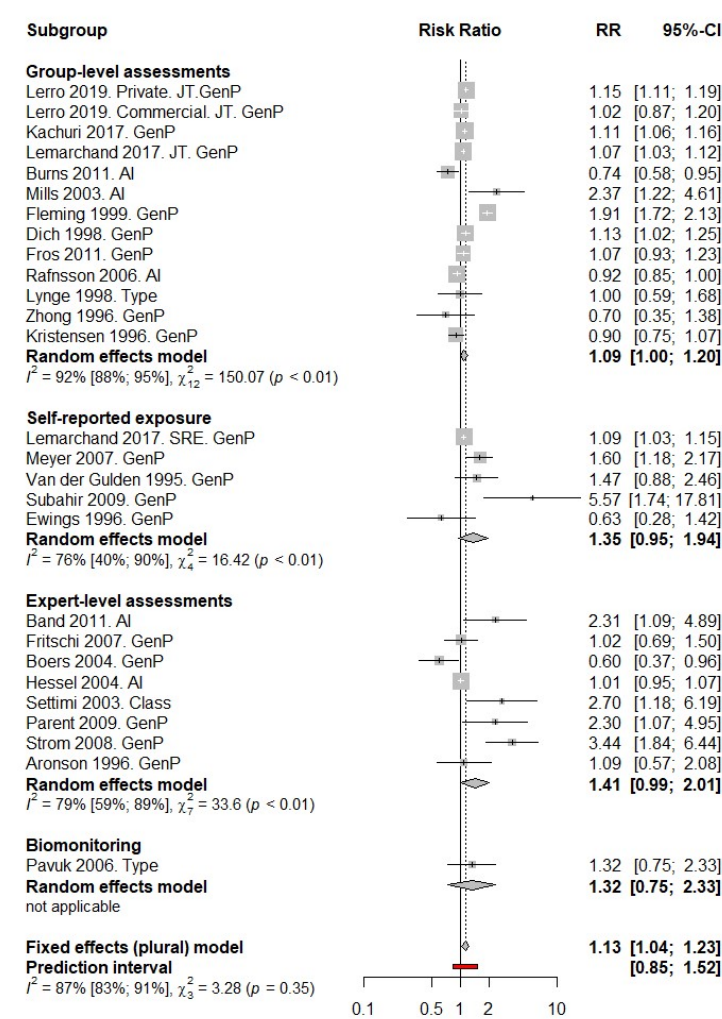

**Figure S3.1.** Summary risk ratios for prostate cancer by EAM type based on random-effects meta-analysis of articles on occupational pesticide exposure published between 1995-2019. RR=relative risk.  $I^2$ =percentage of variation across studies that is due to heterogeneity. JT=job title. SRE=self-reported exposure. GenP=general pesticides. Type=type of pesticide. AI=active ingredient. Private=private pesticide applicator. Commercial=commercial pesticide applicator.

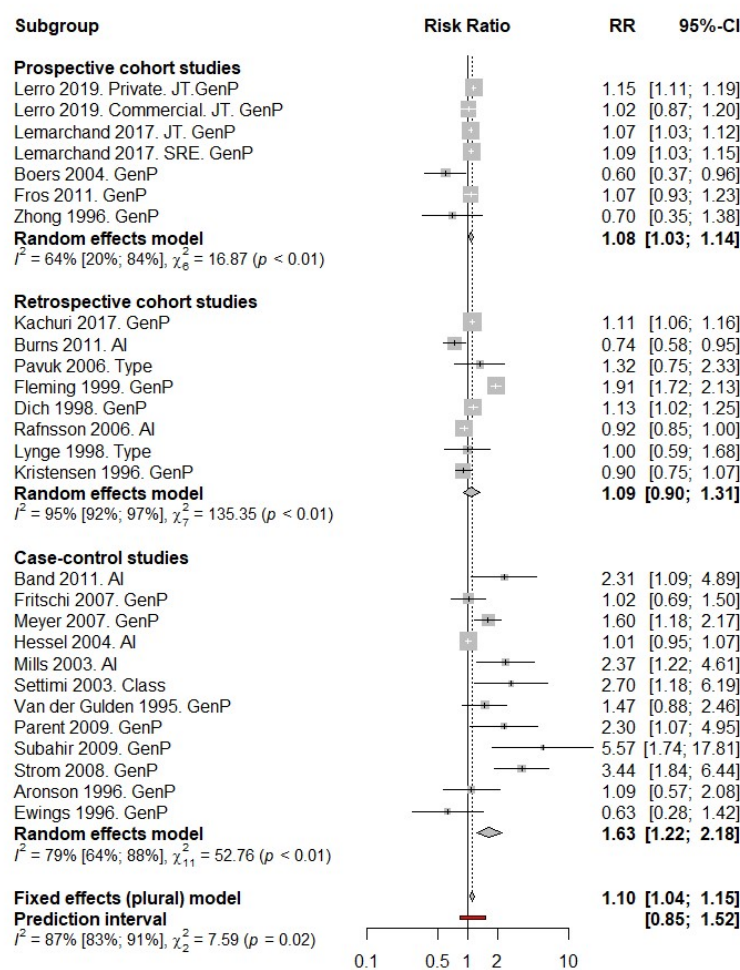

**Figure S3.2.** Summary risk ratios for prostate cancer by study design based on random-effects meta-analysis of articles on occupational pesticide exposure published between 1995-2019. RR=relative risk.  $I^2$ =percentage of variation across studies that is due to heterogeneity. JT=job title. SRE=self-reported exposure. GenP=general pesticides. Type=type of pesticide. AI=active ingredient. Private=private pesticide applicator. Commercial=commercial pesticide applicator.

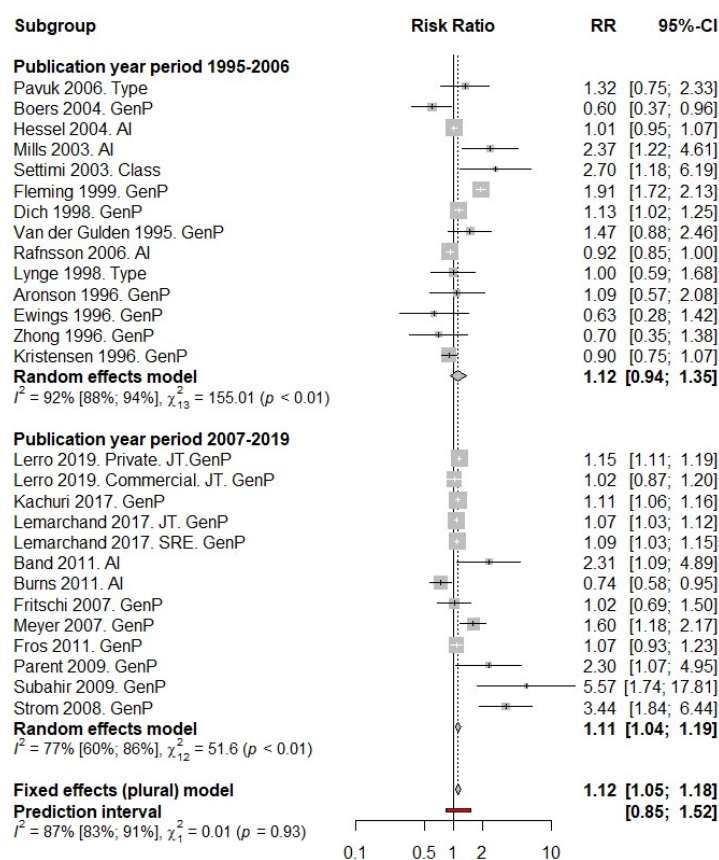

**Figure S3.3.** Summary risk ratios for prostate cancer by publication year period based on random-effects meta-analysis of articles on occupational pesticide exposure published between 1995-2019. RR=relative risk.  $I^2$ =percentage of variation across studies that is due to heterogeneity. JT=job title. SRE=self-reported exposure. GenP=general pesticides. Type=type of pesticide. AI=active ingredient. Private=private pesticide applicator. Commercial=commercial pesticide applicator.

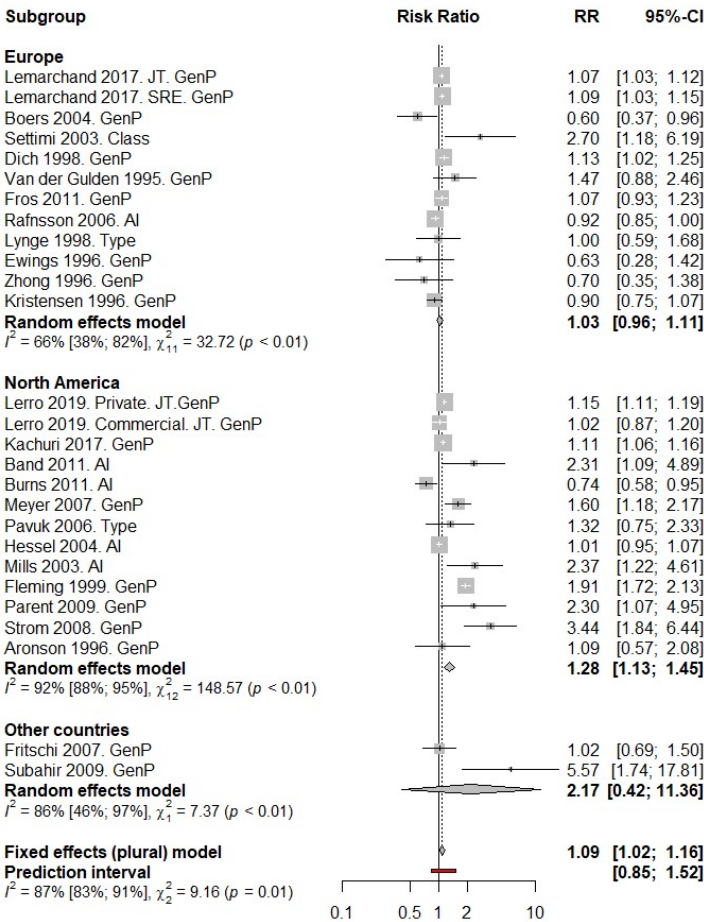

**Figure S3.4.** Summary risk ratios for prostate cancer by geographic location where the study was performed based on random-effects meta-analysis of articles on occupational pesticide exposure published between 1995-2019. RR=relative risk.  $I^2$ =percentage of variation across studies that is due to heterogeneity. JT=job title. SRE=self-reported exposure. GenP=general pesticides. Type=type of pesticide. AI=active ingredient. Private=private pesticide applicator. Commercial=commercial pesticide applicator.

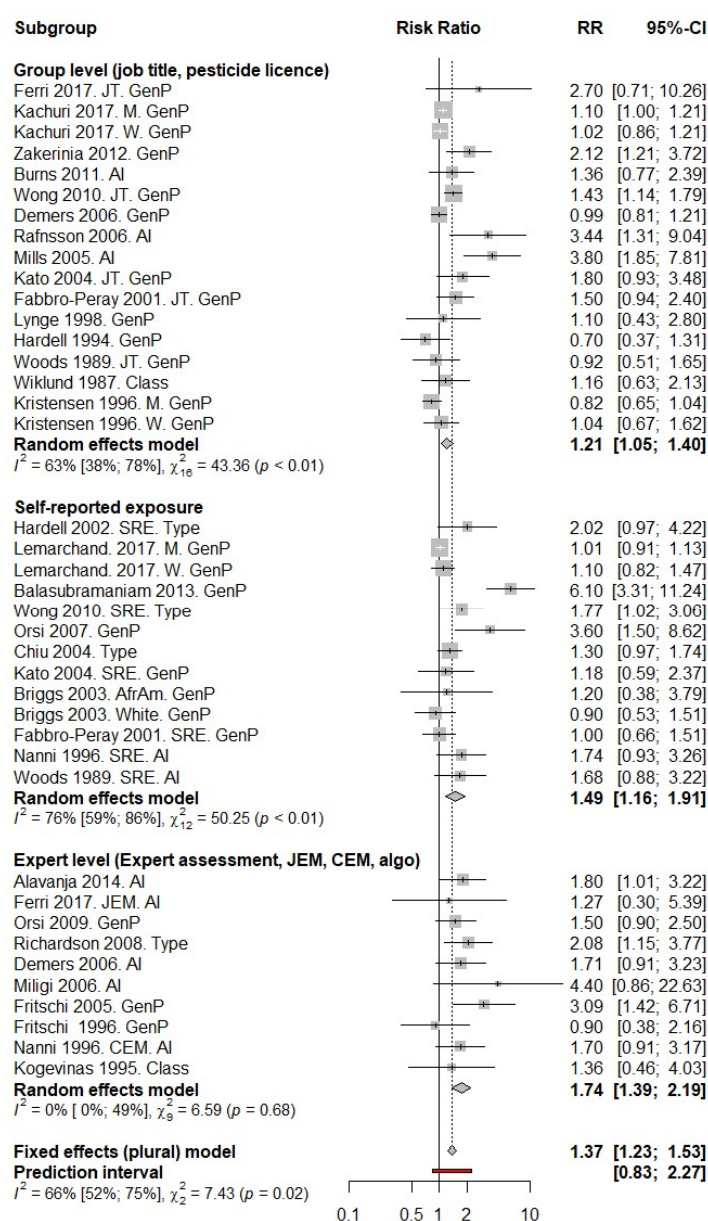

**Figure S3.5** Summary risk ratios for Non-Hodgkin's lymphoma by EAM type based on random-effects meta-analysis of articles on occupational pesticide exposure published between 1987-2017. RR=relative risk.  $I^2$ =percentage of variation across studies due to heterogeneity. JT=job title. SRE=self-reported exposure. JEM=job-exposure matrix. CEM=crop-exposure matrix. Algo=exposure algorithm. GenP=general pesticides. Type=type of pesticide. Class=class of pesticides. AI=active ingredient. AfrAm=Afro-American. W=women. M=men.

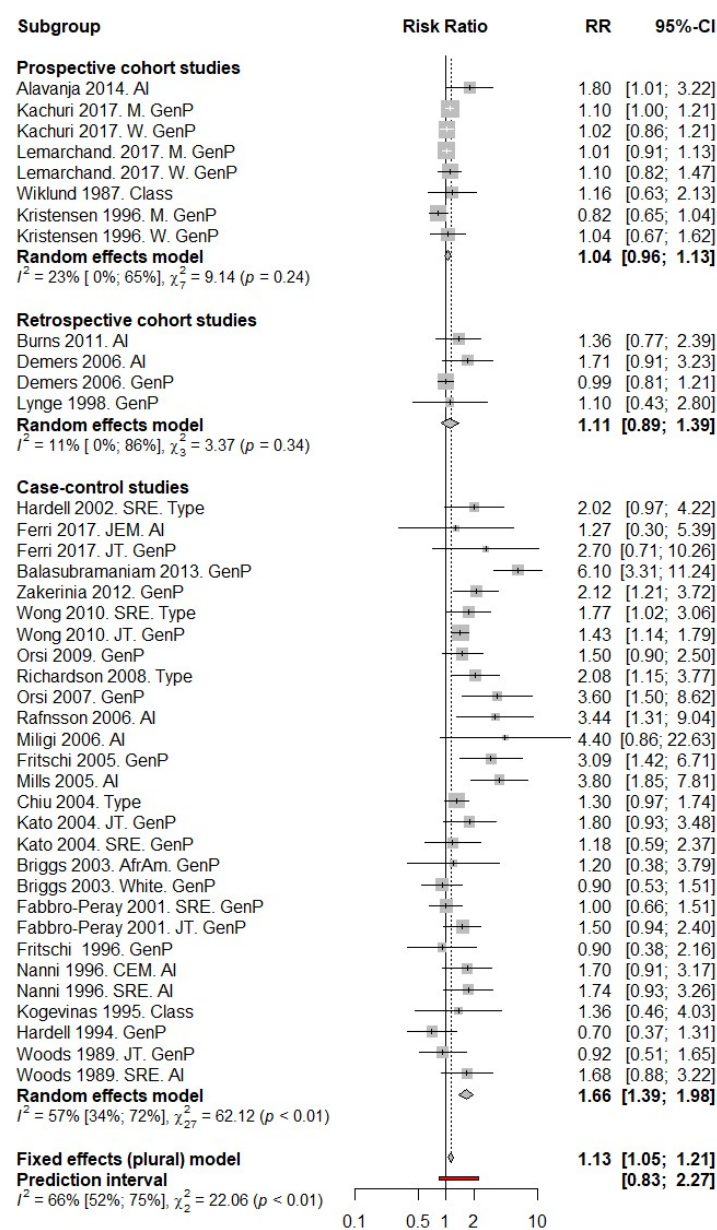

**Figure S3.6** Summary risk ratios for Non-Hodgkin's lymphoma by study design based on random-effects meta-analysis of articles on occupational pesticide exposure published between 1987-2017. RR=relative risk.  $I^2$ =percentage of variation across studies due to heterogeneity. JT=job title. SRE=self-reported exposure. JEM=job-exposure matrix. CEM=crop-exposure matrix. GenP=general pesticides. Type=type of pesticide. Class=class of pesticides. AI=active ingredient. AfrAm=Afro-American. W=women. M=men.

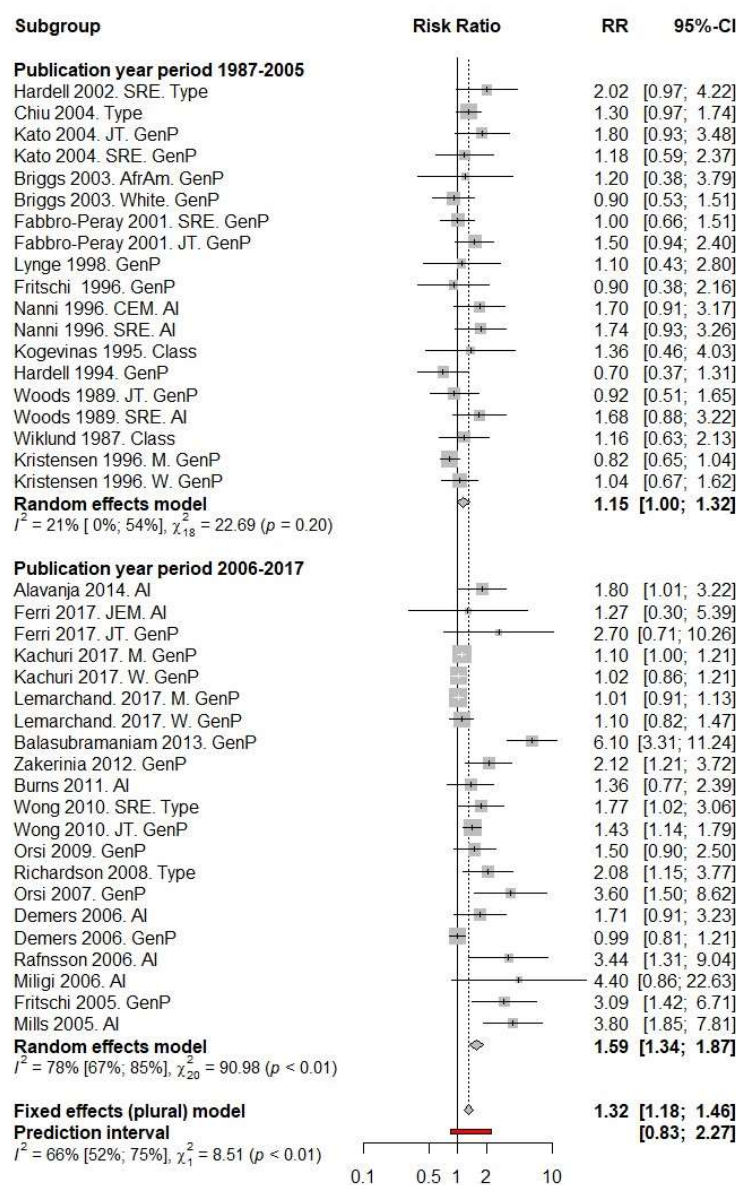

**Figure S3.7** Summary risk ratios for Non-Hodgkin's lymphoma by publication year period based on random-effects meta-analysis of articles on occupational pesticide exposure published between 1987-2017. RR=relative risk.  $I^2$ =percentage of variation across studies due to heterogeneity. JT=job title. SRE=self-reported exposure. JEM=job-exposure matrix. CEM=crop-exposure matrix. GenP=general pesticides. Type=type of pesticide. Class=class of pesticides. AI=active ingredient. AfrAm=Afro-American. W=women. M=men.

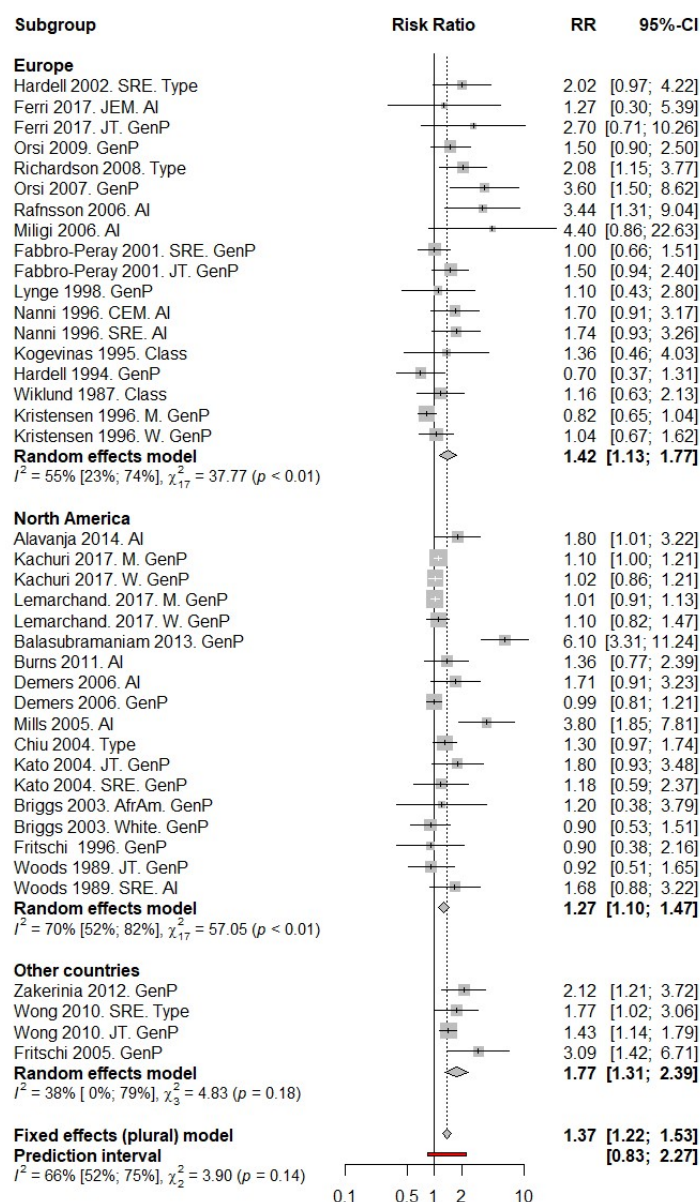

**Figure S3.8** Summary risk ratios for Non-Hodgkin's lymphoma by geographic location where the study was performed based on random-effects meta-analysis of articles on occupational pesticide exposure published between 1987-2017. RR=relative risk.  $I^2$ =percentage of variation across studies due to heterogeneity. JT=job title. SRE=self-reported exposure. JEM=job-exposure matrix. CEM=crop-exposure matrix. GenP=general pesticides. Type=type of pesticide. Class=class of pesticides. AI=active ingredient. AfrAm=Afro-American. W=women. M=men.

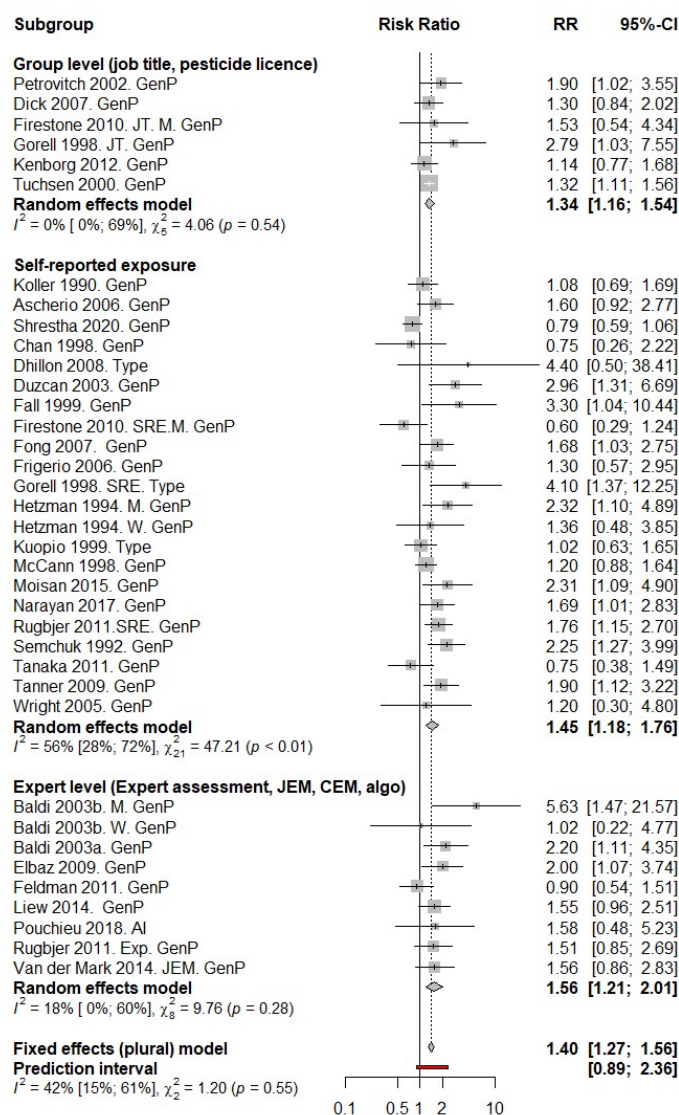

**Figure S3.9.** Summary risk ratios for Parkinson's disease by EAM type based on random-effects meta-analysis of articles on occupational pesticide exposure published between 1987-2017. RR= relative risk.  $I^2$ =percentage of variation across studies due to heterogeneity. JT=job title. SRE=self-reported exposure. GenP=general pesticides. Type=type of pesticide. AI=active ingredient. AfrAm=Afro-American. W=women. M=men.

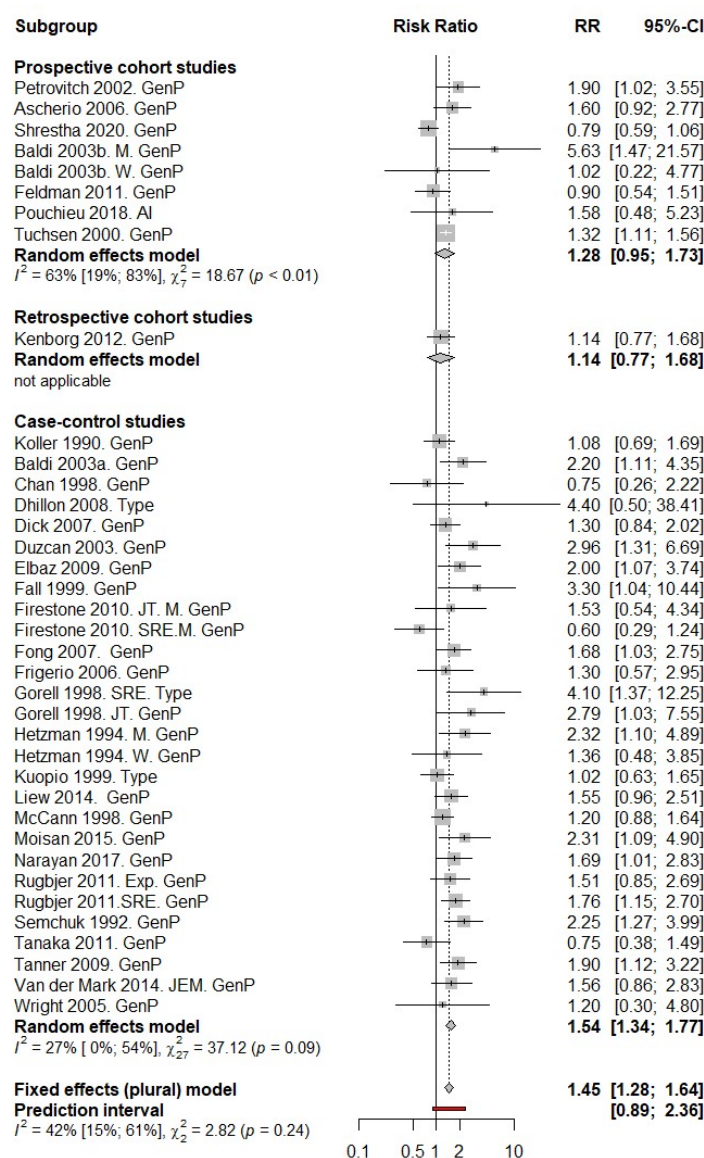

**Figure S3.10.** Summary risk ratios for Parkinson's disease by study design based on random-effects meta-analysis of articles on occupational pesticide exposure published between 1987-2017. RR= relative risk.  $I^2$ =percentage of variation across studies due to heterogeneity. JT=job title. SRE=self-reported exposure. GenP=general pesticides. Type=type of pesticide. AI=active ingredient. AfrAm=Afro-American. W=women. M=men.

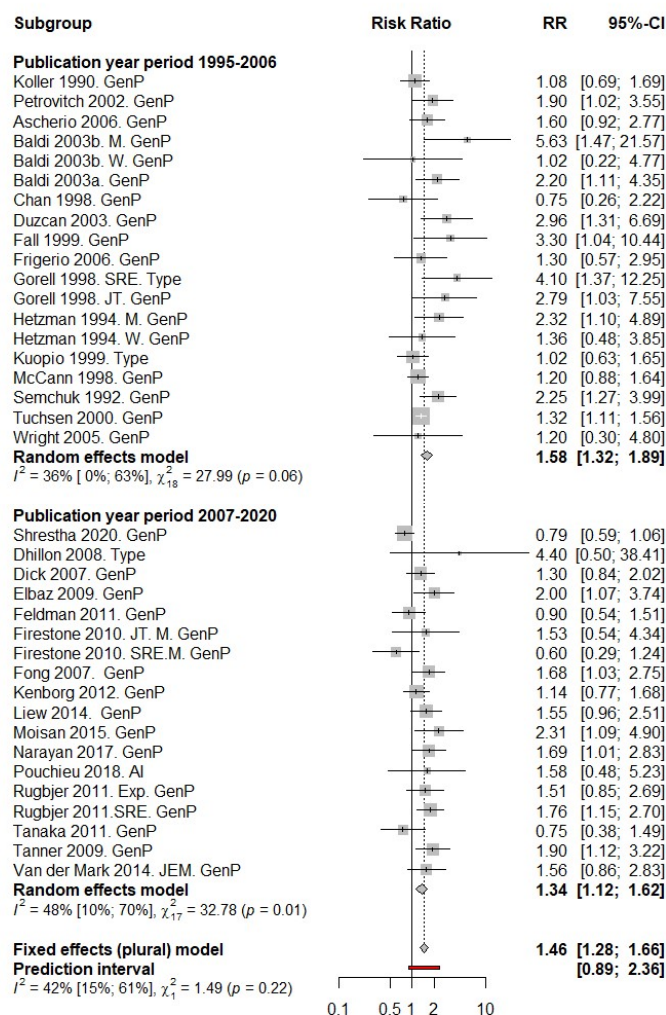

**Figure S3.11.** Summary risk ratios for Parkinson's disease by publication year period based on random-effects meta-analysis of articles on occupational pesticide exposure published between 1987-2017. RR= relative risk.  $I^2$ =percentage of variation across studies due to heterogeneity. JT=job title. SRE=self-reported exposure. GenP=general pesticides. Type=type of pesticide. AI=active ingredient. AfrAm=Afro-American. W=women. M=men.

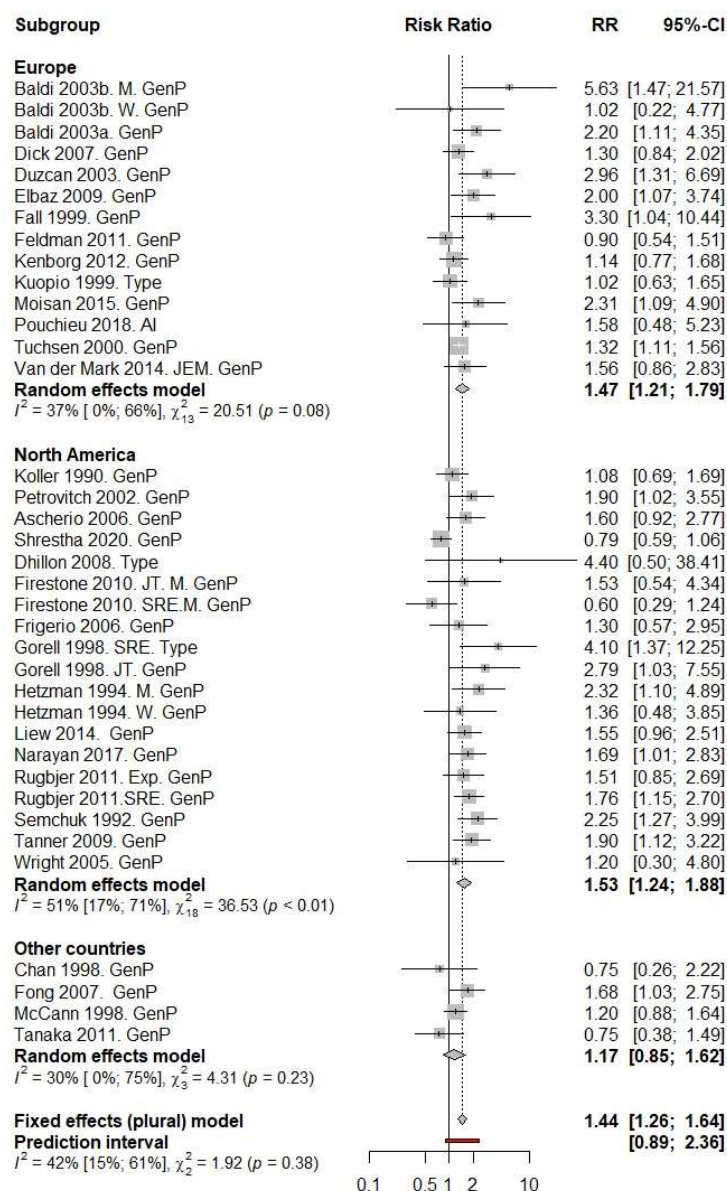

**Figure S3.12.** Summary risk ratios for Parkinson's disease by geographic location where the study was performed based on random-effects meta-analysis of articles on occupational pesticide exposure published between 1987-2017. RR=relative risk.  $I^2$ =percentage of variation across studies due to heterogeneity. JT=job title. SRE=self-reported exposure. GenP=general pesticides. Type=type of pesticide. AI=active ingredient. AfrAm=Afro-American. W=women. M=men.
